# Supplementary material for: Near-infrared phosphorescence in a ruthenium(ii) complex equipped with a pyridyl-1,2-azaborine ligand
Source: Royal Society of Chemistry journal article supplement (doi:10.1039/d4dt03115f), 2024-11-28
Supplement: d4dt03115f1.pdf [file d4dt03115f1.pdf]

## Supporting Information

# Near-infrared phosphorescence in a ruthenium(II) complex equipped with a pyridyl-1,2-azaborine ligand

Matteo Pompei,<sup>a</sup> Filippo Monti,<sup>\*b</sup> Letizia Sambri,<sup>a</sup> Nicola Armaroli<sup>b</sup> and Andrea Baschieri<sup>\*b</sup>

<sup>a</sup> Department of Industrial Chemistry "Toso Montanari", University of Bologna, Via Piero Gobetti 85, 40129 Bologna, Italy.

<sup>b</sup> Institute for Organic Synthesis and Photoreactivity (ISOF), National Research Council of Italy (CNR), Via Piero Gobetti 101, 40129 Bologna, Italy.

E-mail: F. M.: [filippo.monti@isof.cnr.it](mailto:filippo.monti@isof.cnr.it)  
A. B.: [andrea.baschieri@isof.cnr.it](mailto:andrea.baschieri@isof.cnr.it)

## Table of Contents

| <b><i>Contents</i></b>                              | <b><i>Pages</i></b> |
|-----------------------------------------------------|---------------------|
| NMR spectra of complexes <b>A–D</b>                 | S2 – S9             |
| ESI <sup>+</sup> spectrum of complexes <b>A–D</b>   | S10 – S13           |
| Ground-state computational and electrochemical data | S14 – S20           |
| Excited-state computational and photophysical data  | S20 – S30           |

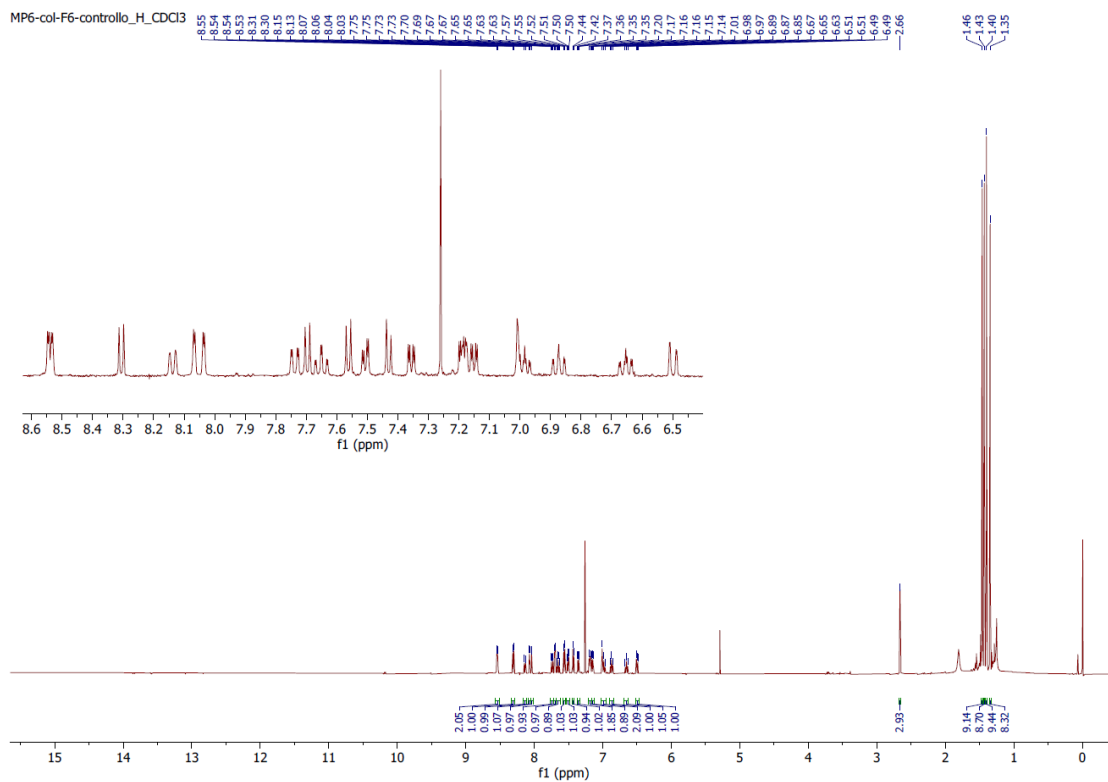

**Figure S1.**  $^1\text{H}$  NMR spectrum of complex **A** in  $\text{CDCl}_3$ .

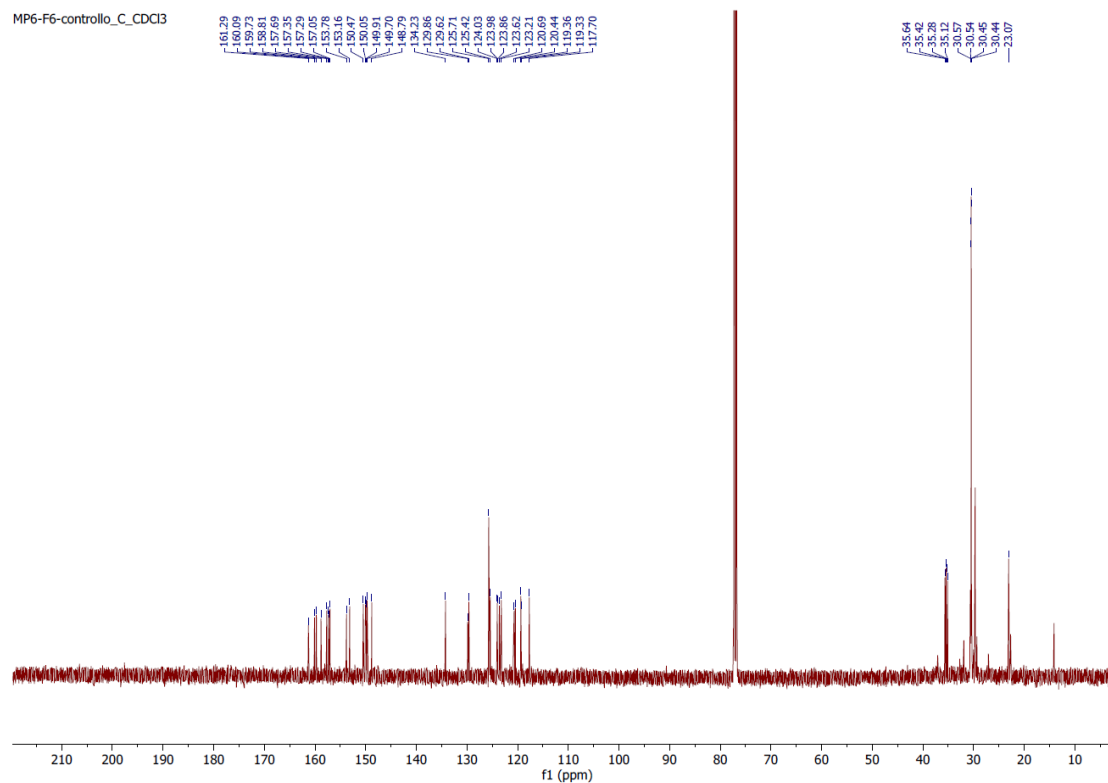

**Figure S2.**  $^{13}\text{C}$   $\{^1\text{H}\}$  NMR spectrum of complex **A** in  $\text{CDCl}_3$ .

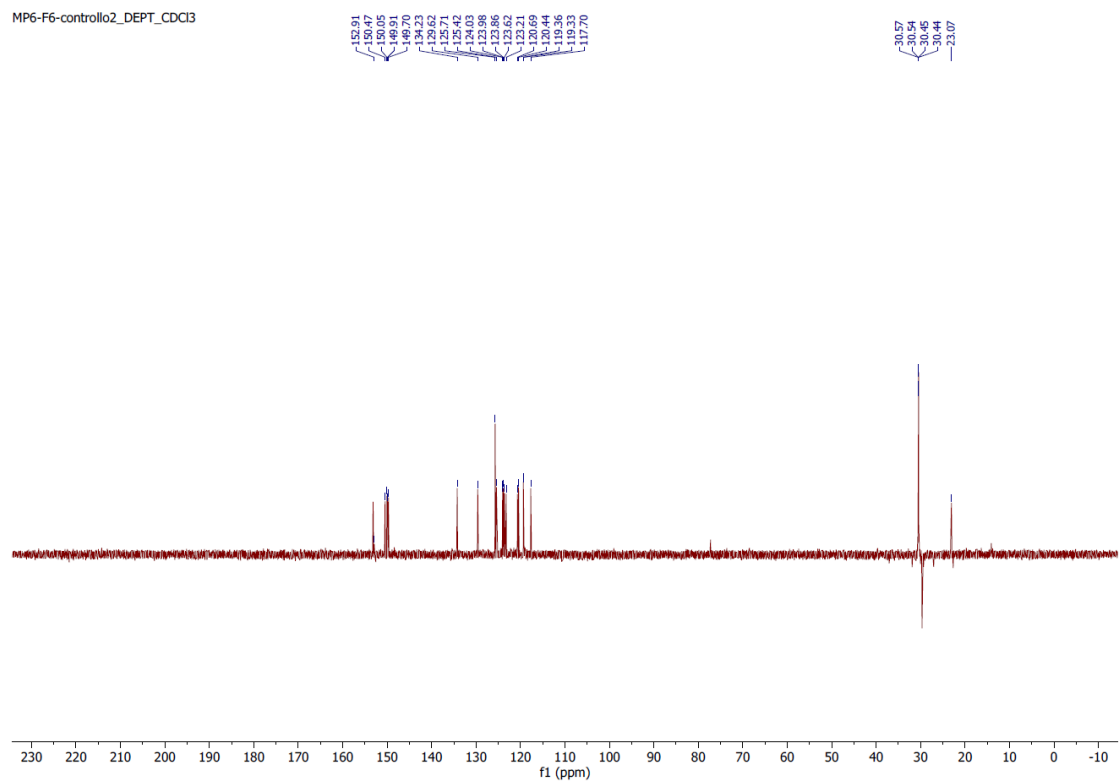

**Figure S3.** DEPT 135  $\{^1\text{H}\}$  NMR spectrum of complex **A** in  $\text{CDCl}_3$ .

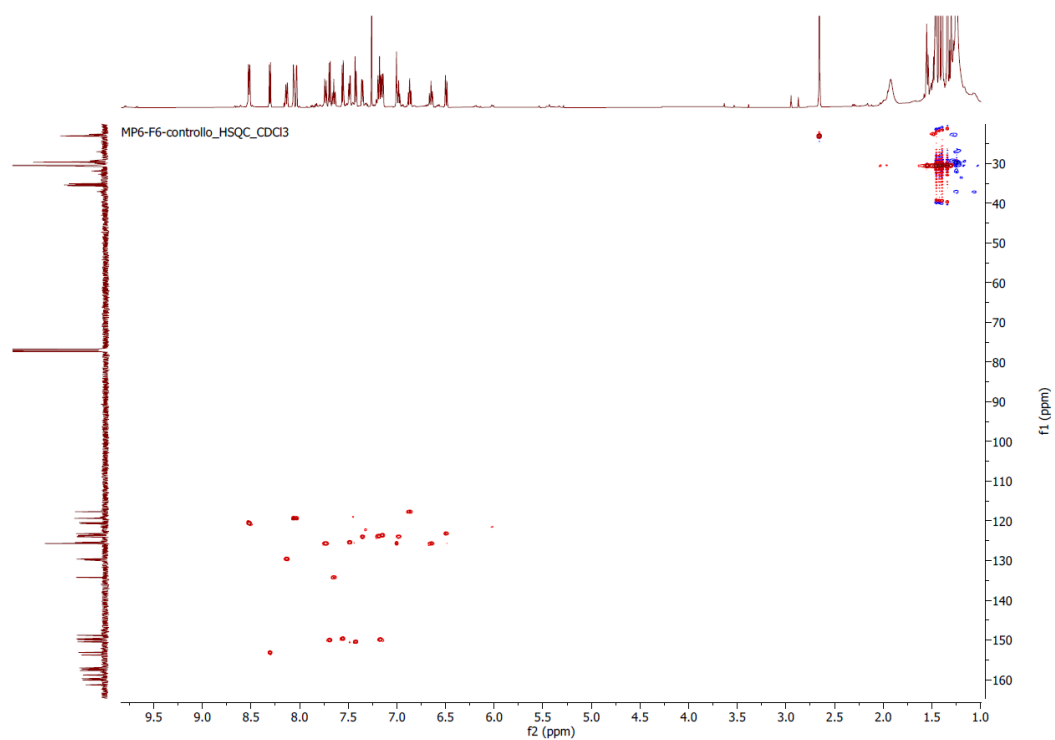

**Figure S4.** HSQC NMR spectrum of complex **A** in  $\text{CDCl}_3$ .

MP6-F6\_F\_CDCl3  
STANDARD FLUORINE PARAMETERS

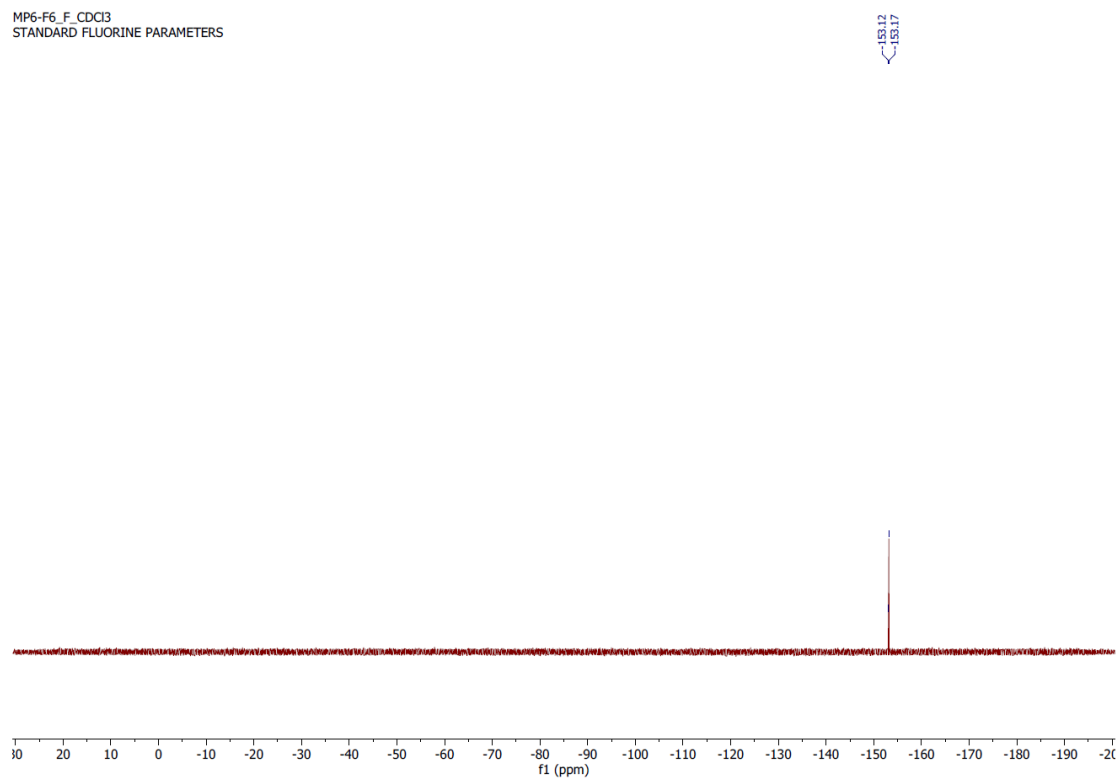

**Figure S5.**  $^{19}\text{F}$  NMR spectrum of complex **A** in  $\text{CDCl}_3$ .

MP6-F6-controllo2\_B\_CDCl3

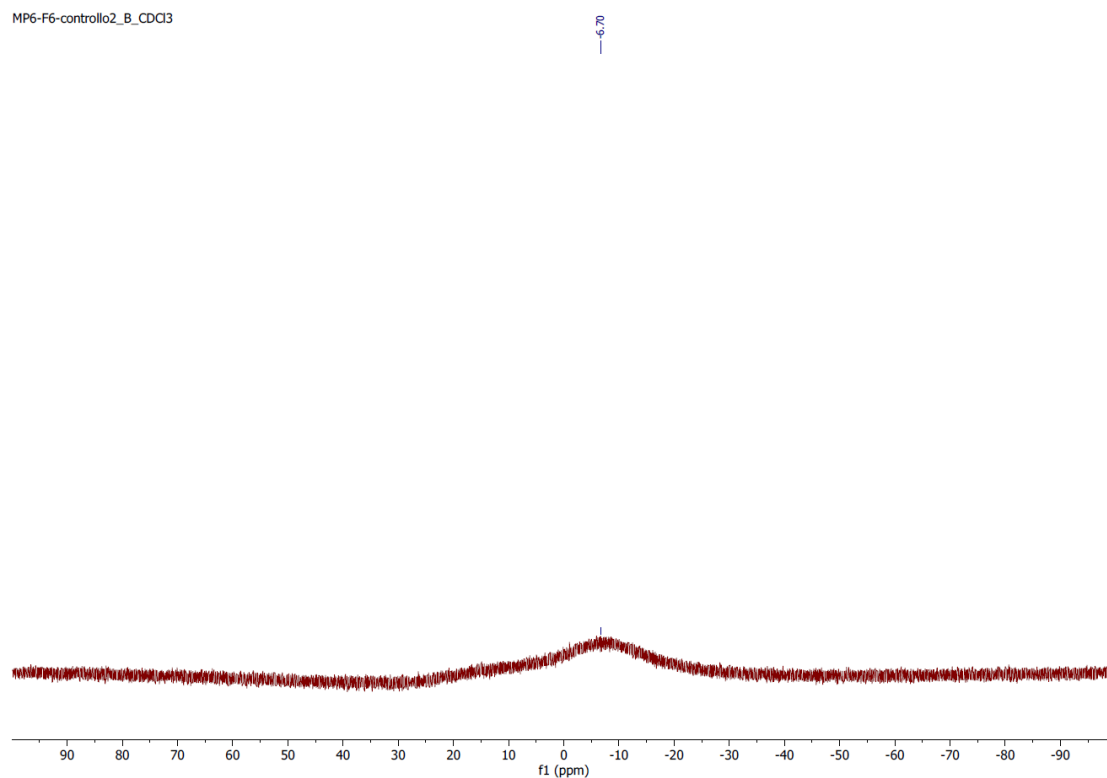

**Figure S6.**  $^{11}\text{B}$  NMR spectrum of complex **A** in  $\text{CDCl}_3$ .



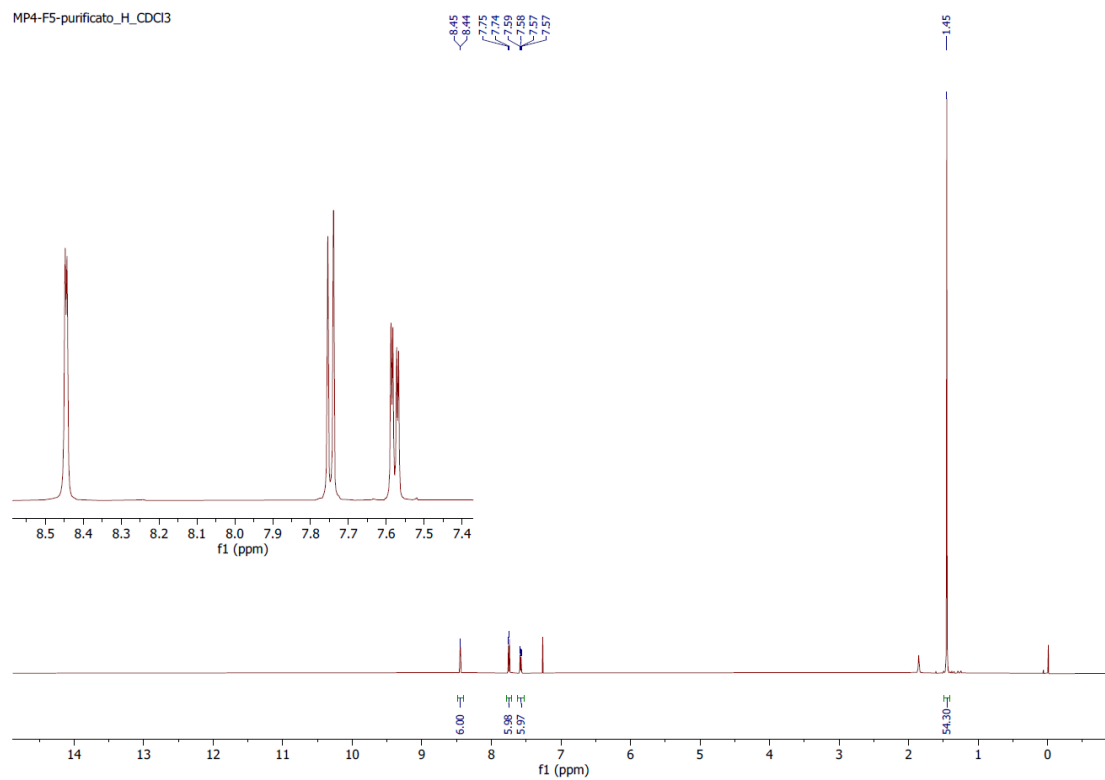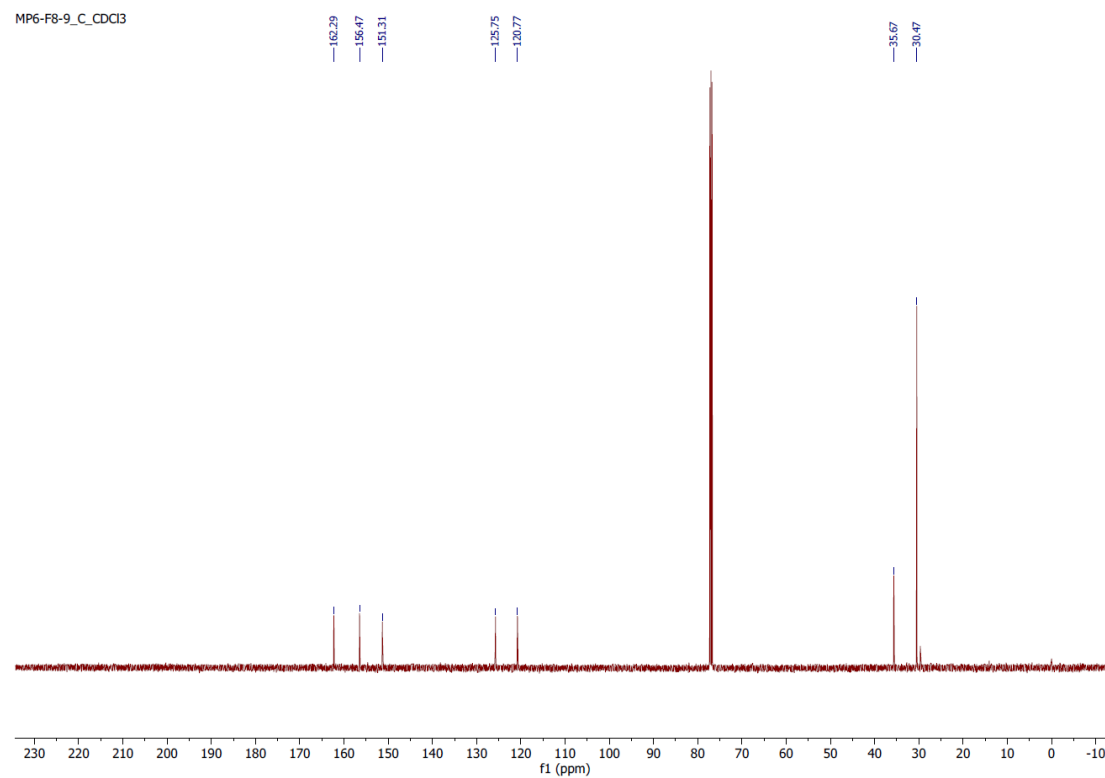

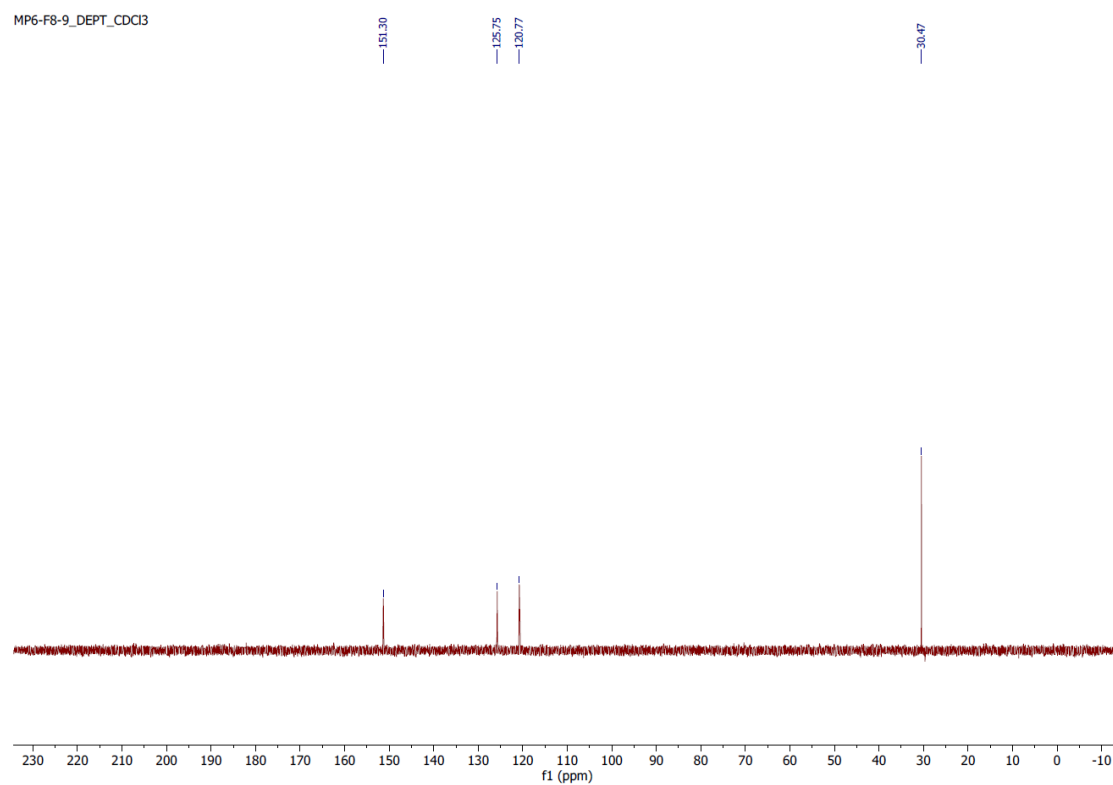

**Figure S9.** DEPT 135  $\{^1\text{H}\}$  NMR spectrum of complex **B** in  $\text{CDCl}_3$ .

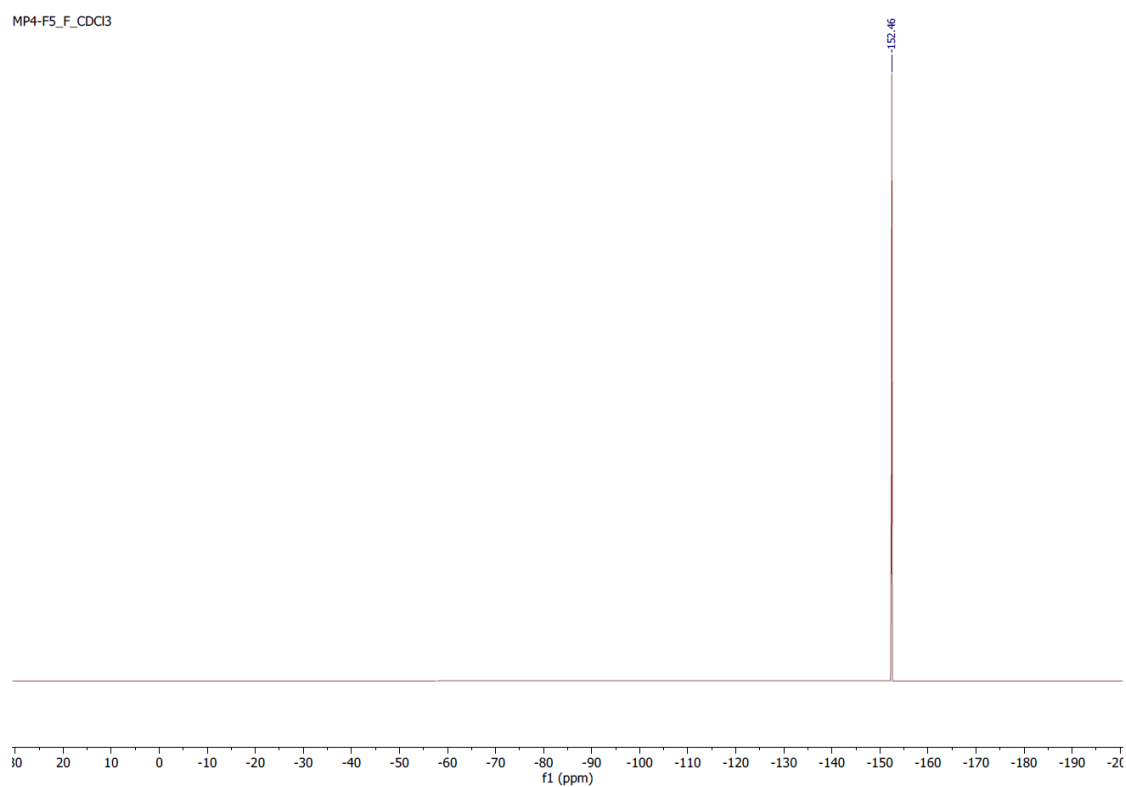

**Figure S10.**  $^{19}\text{F}$  NMR spectrum of complex **B** in  $\text{CDCl}_3$ .

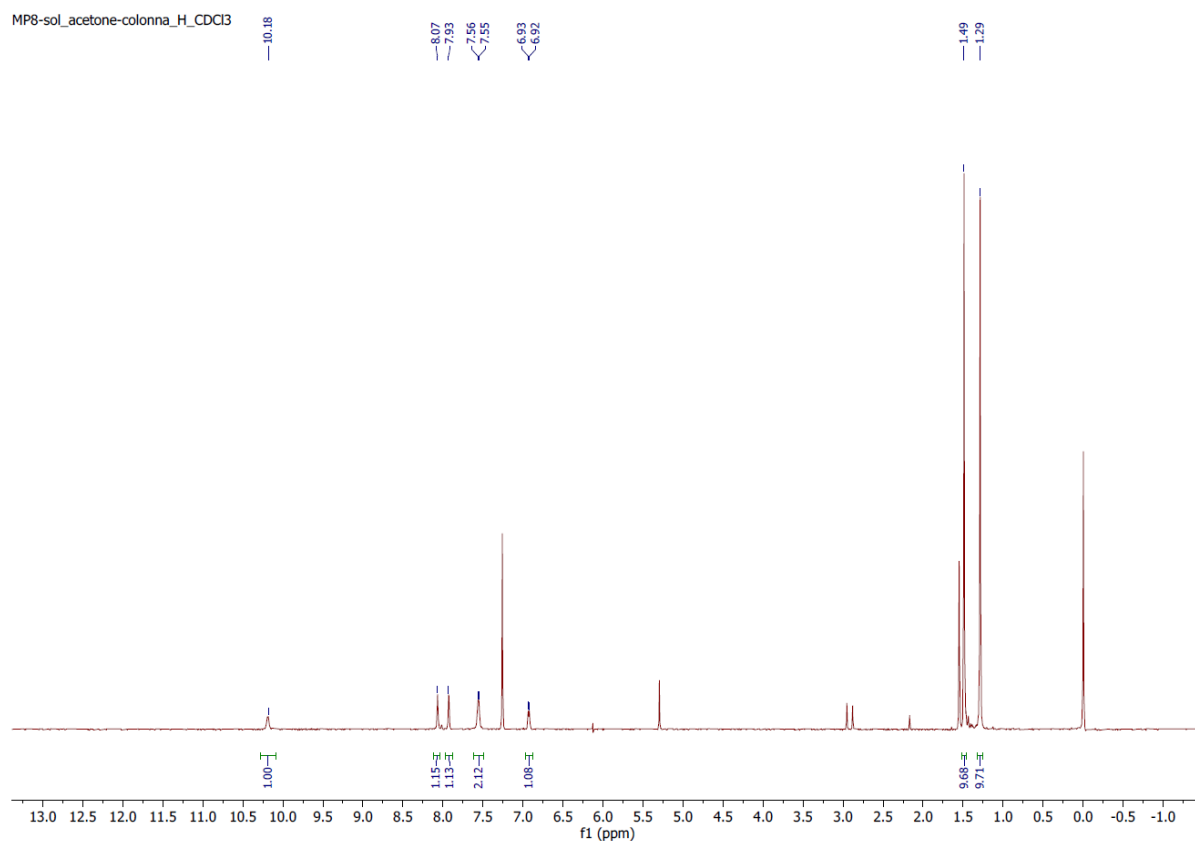

**Figure S11.**  $^1\text{H}$  NMR spectrum of precursor  $[\text{Ru}(\text{dtbpy})_2\text{Cl}_2]$  in  $\text{CDCl}_3$ .

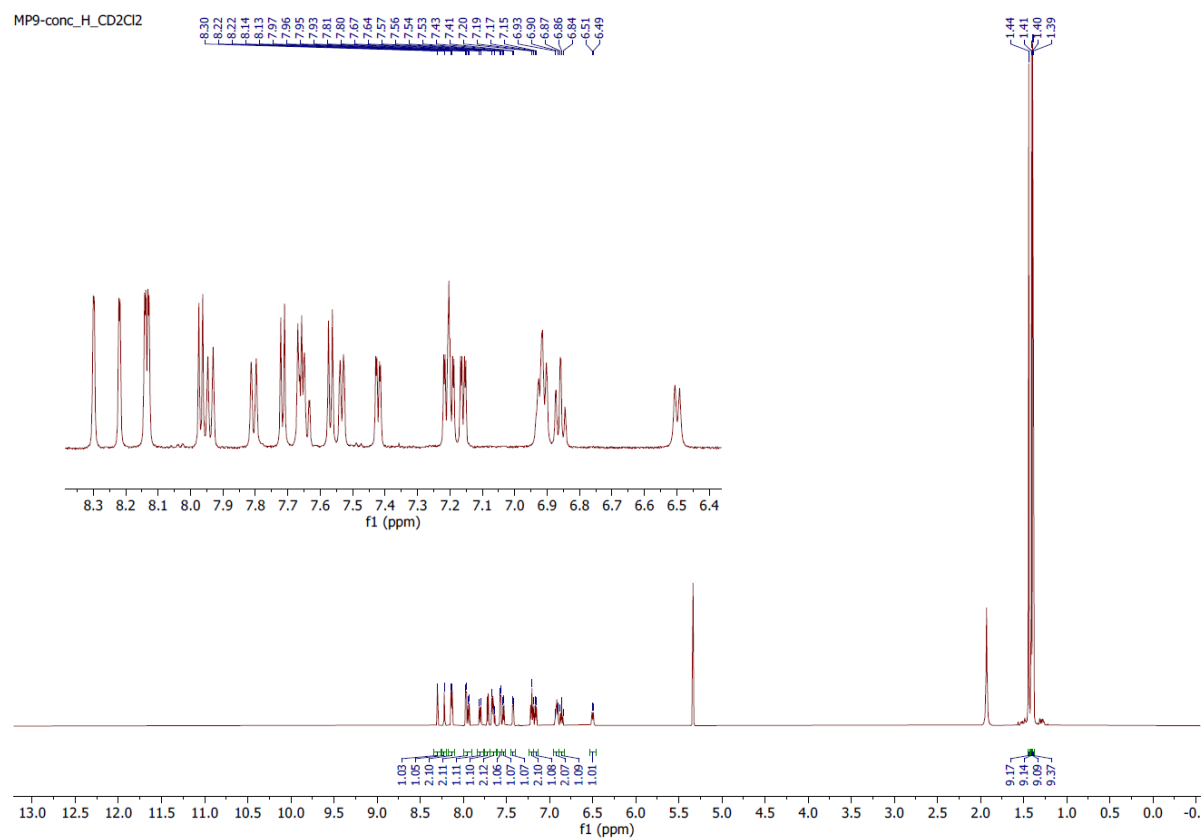

**Figure S12.**  $^1\text{H}$  NMR spectrum of complex **C** in  $\text{CD}_2\text{Cl}_2$ .

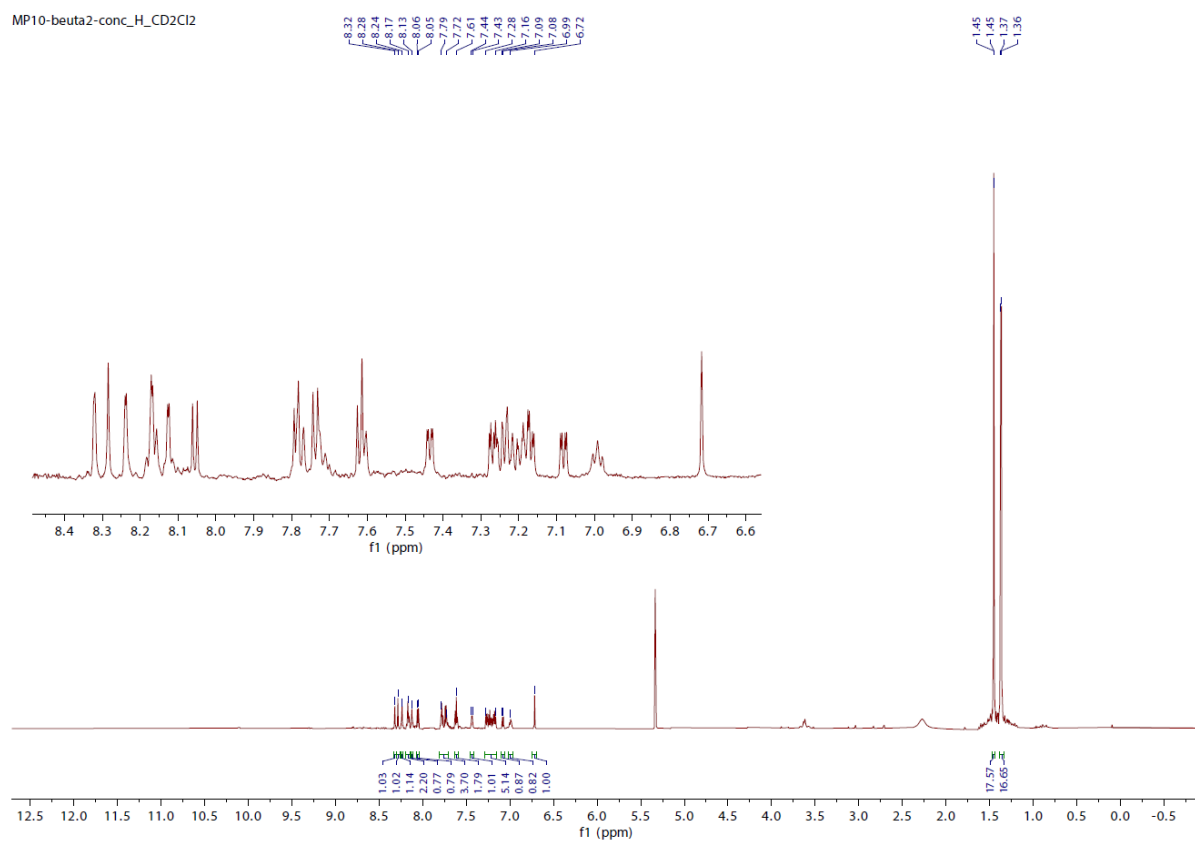

**Figure S13.**  $^1\text{H}$  NMR spectrum of complex **D** in  $\text{CD}_2\text{Cl}_2$ .

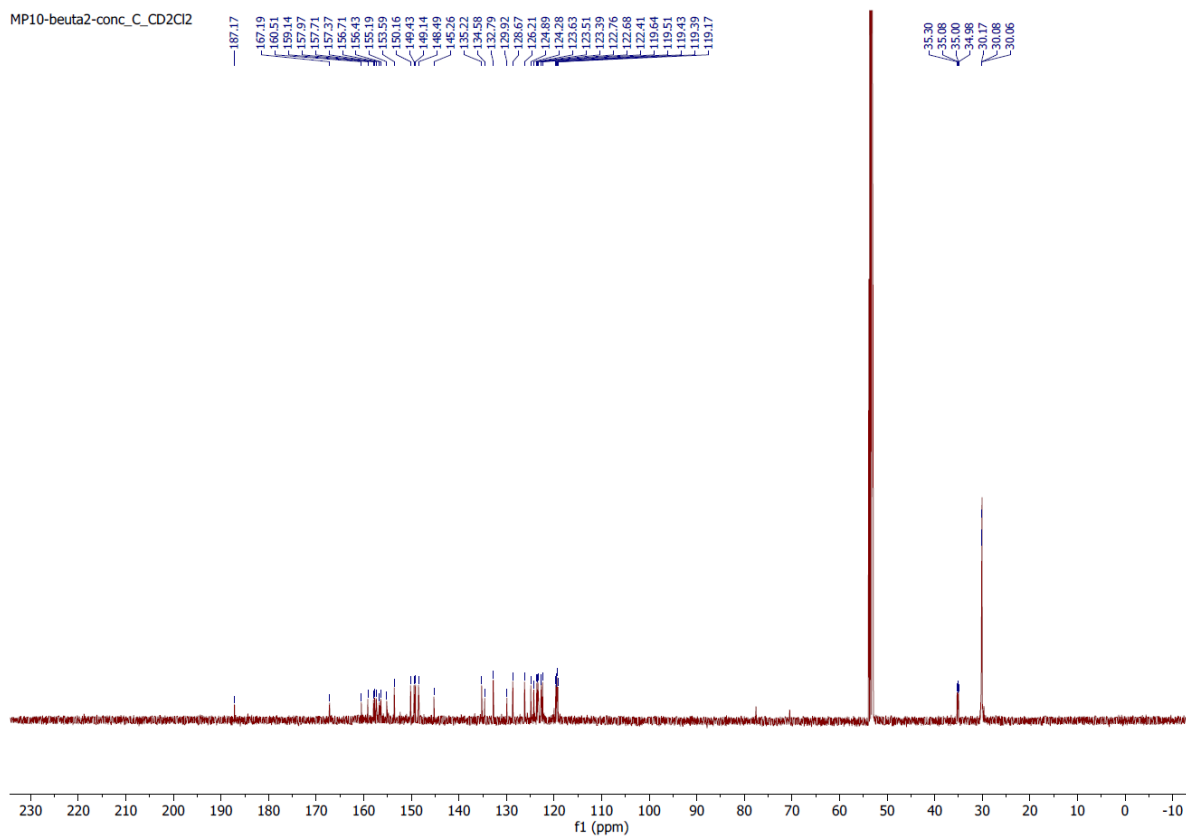

**Figure S14.**  $^{13}\text{C}$   $\{^1\text{H}\}$  NMR spectrum of complex **D** in  $\text{CD}_2\text{Cl}_2$ .

MP10-beuta2-conc\_DEPT\_CD2Cl2

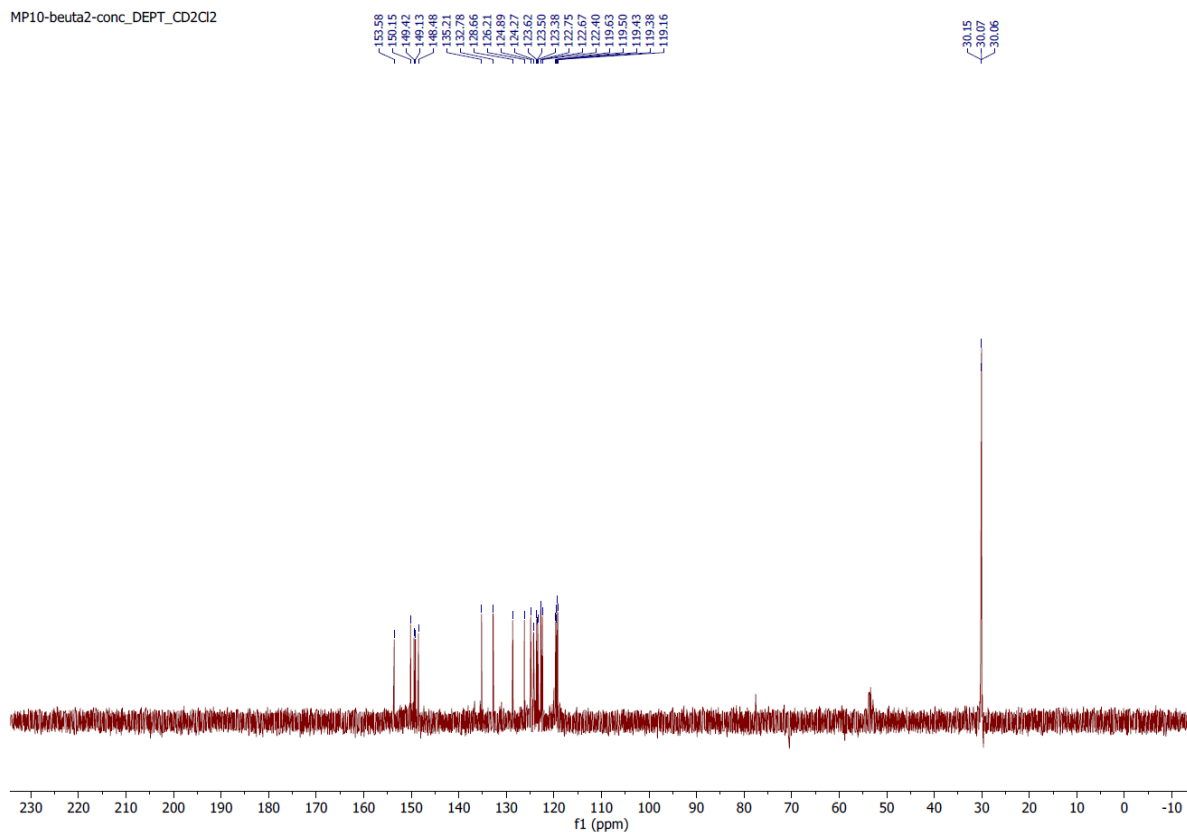

**Figure S15.** DEPT 135  $\{^1\text{H}\}$  NMR spectrum of complex **D** in  $\text{CD}_2\text{Cl}_2$ .

MP10-beuta2-conc\_F\_CD2Cl2  
STANDARD FLUORINE PARAMETERS

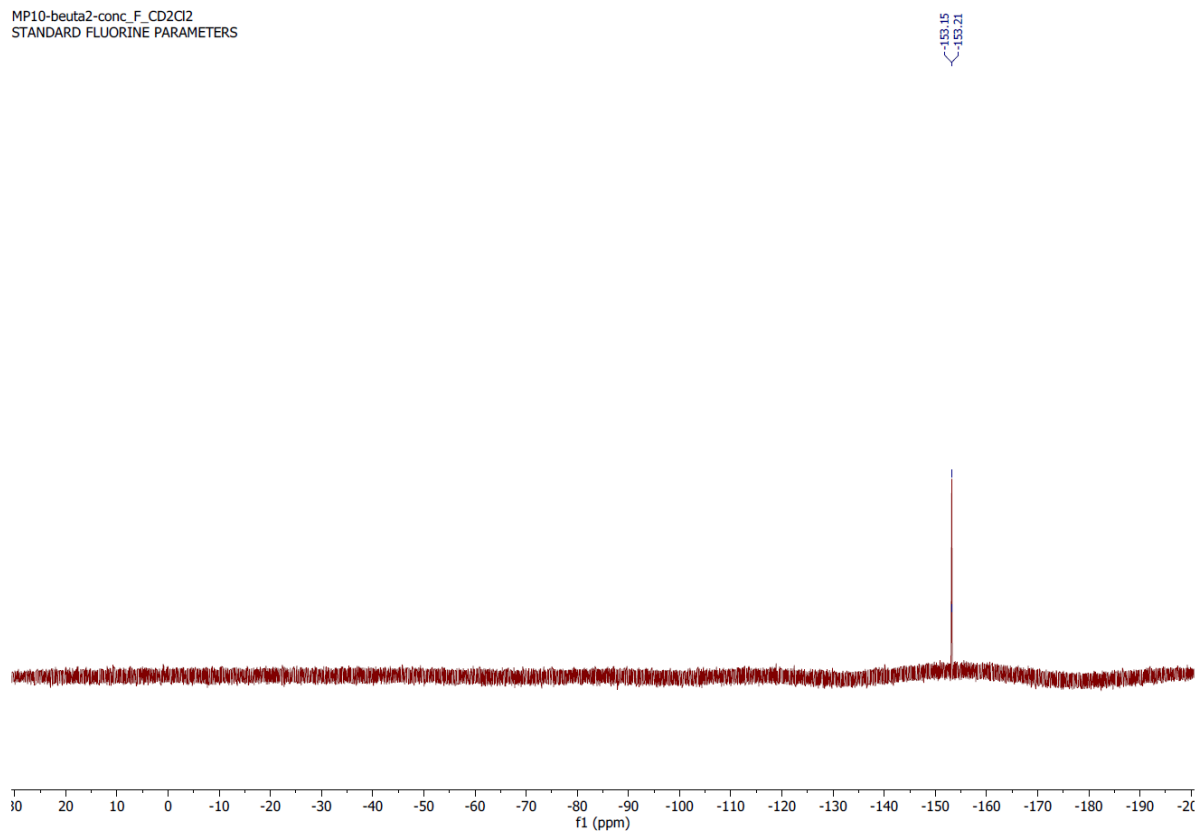

**Figure S16.**  $^{19}\text{F}$  NMR spectrum of complex **D** in  $\text{CD}_2\text{Cl}_2$ .

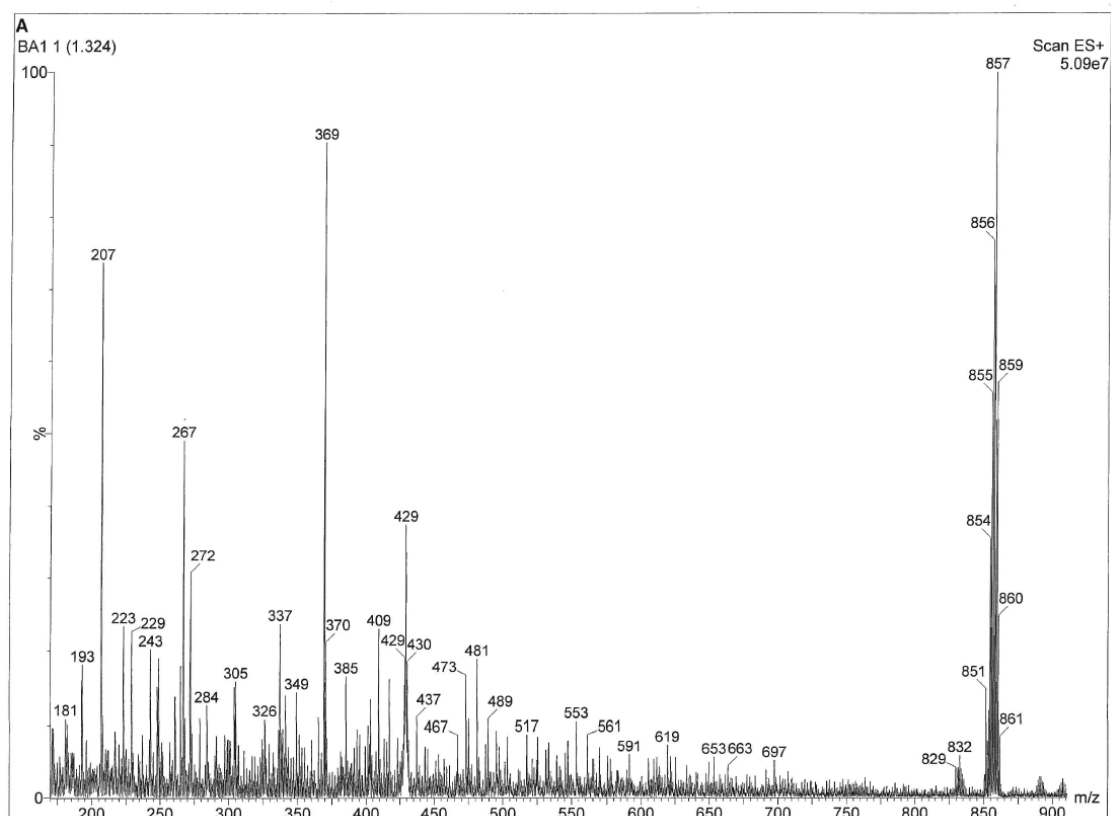

**Figure S17.** ESI<sup>+</sup> spectrum of complex **A**.

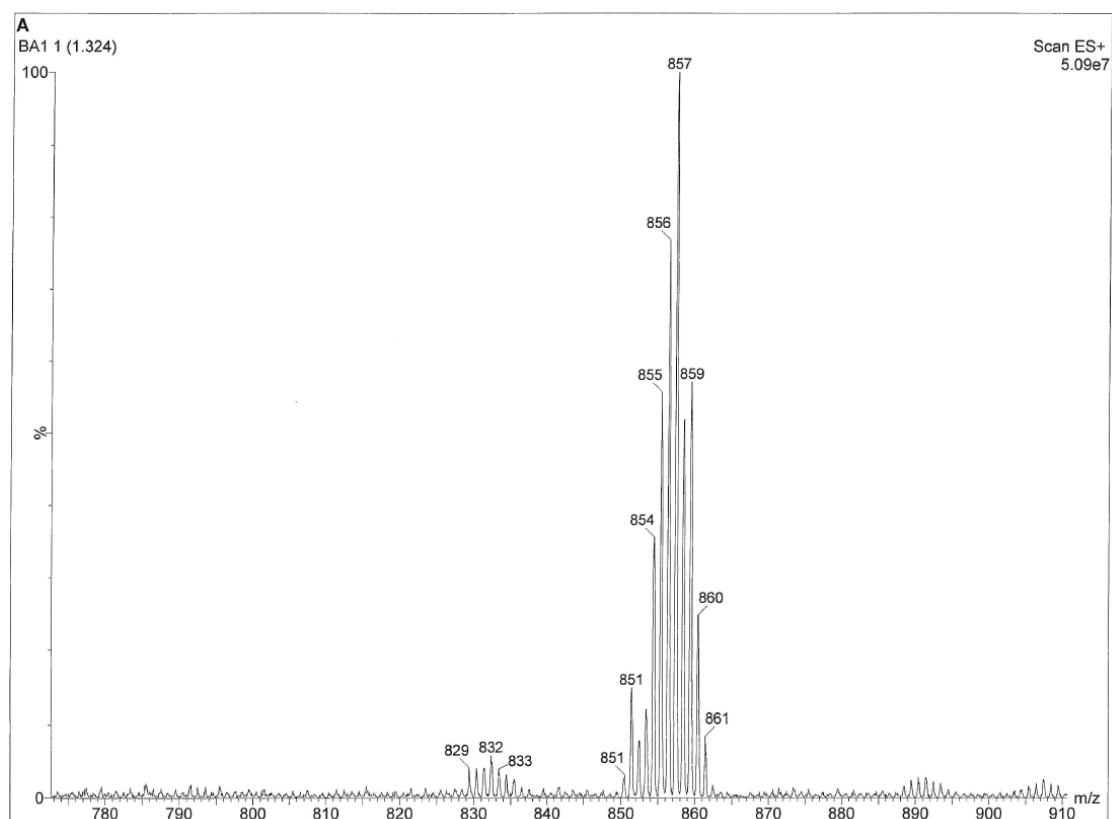

**Figure S18.** Detail of the ESI<sup>+</sup> spectrum of complex **A**.

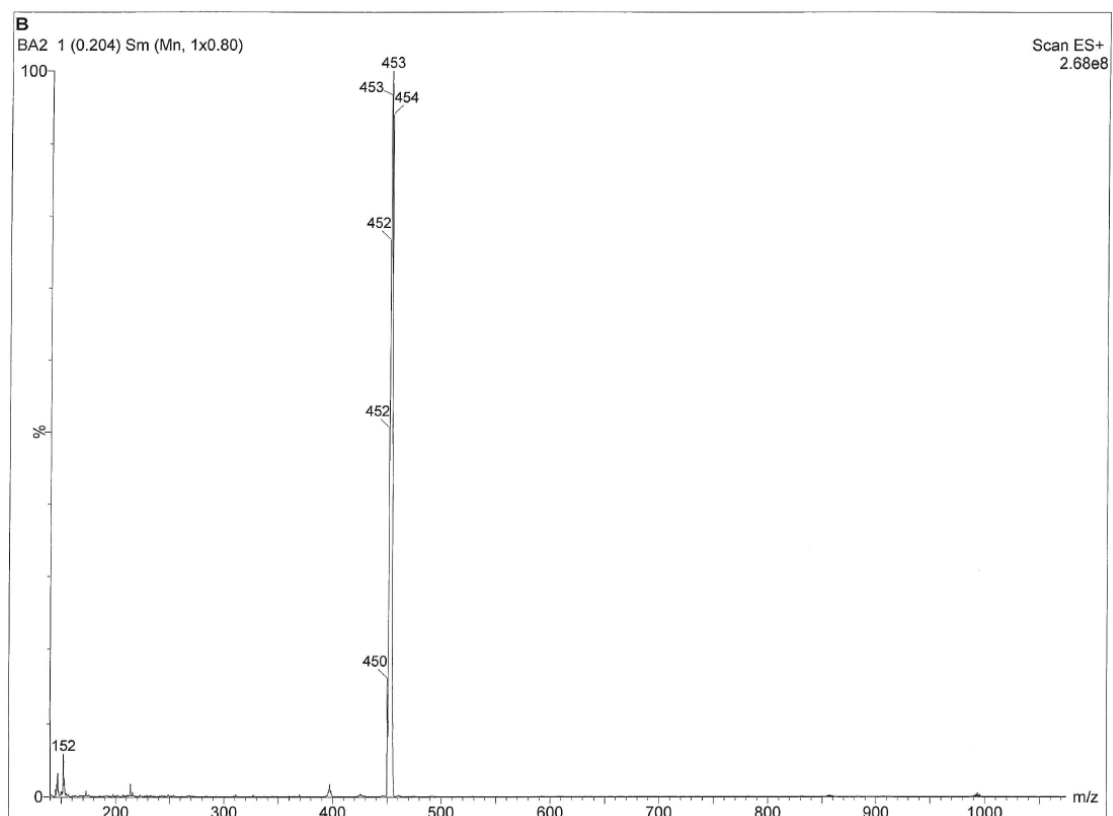

**Figure S19.** ESI<sup>+</sup> spectrum of complex **B**.

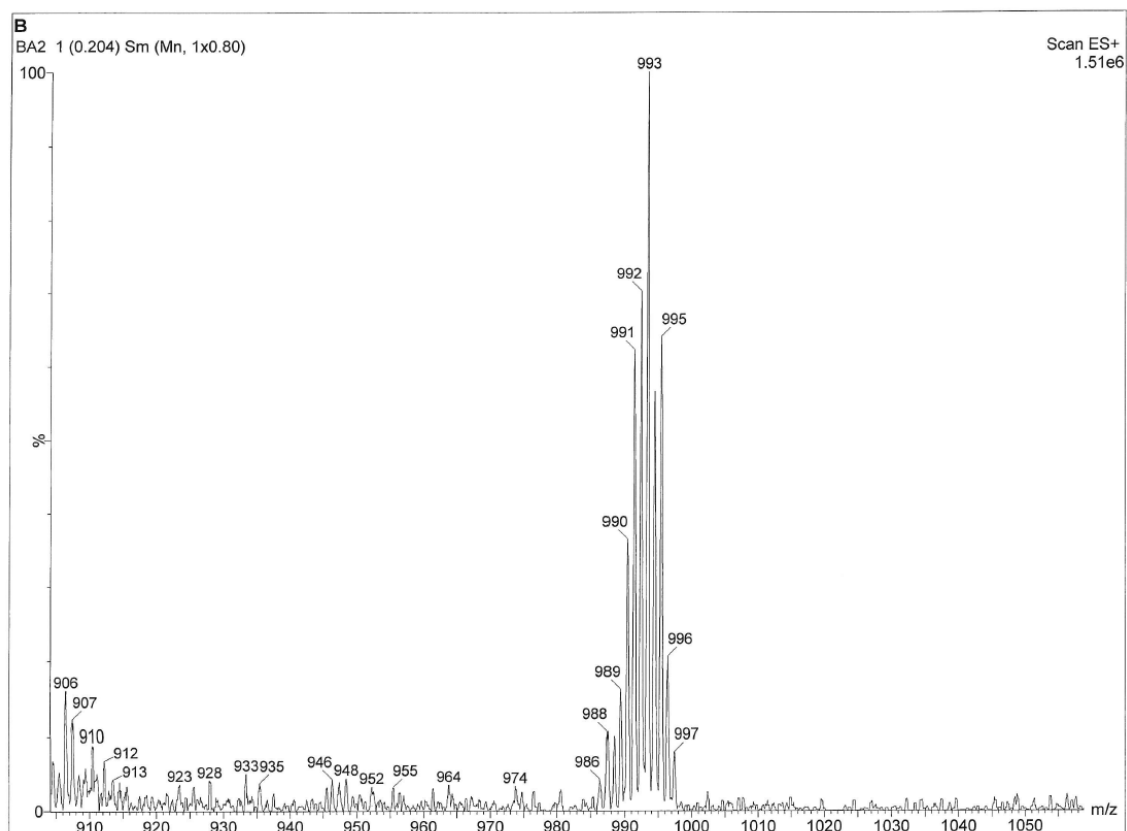

**Figure S20.** Detail of the ESI<sup>+</sup> spectrum of complex **B**.

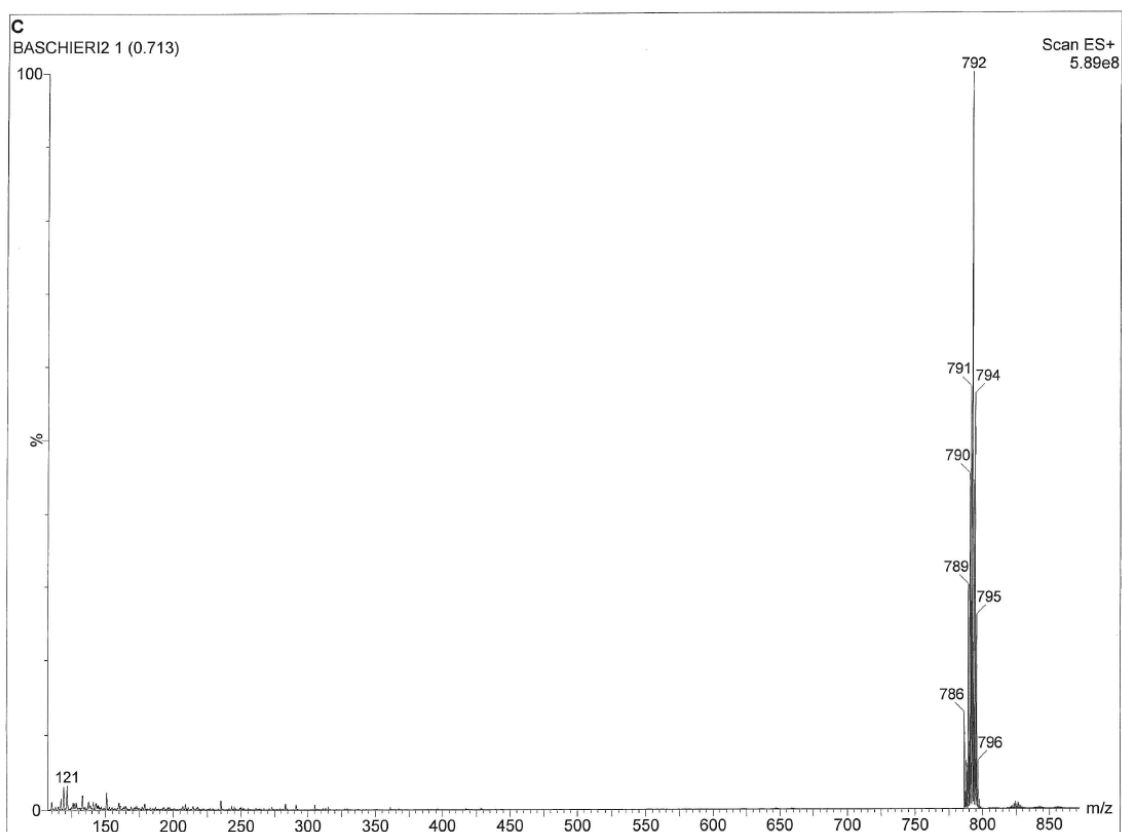

**Figure S21.** ESI<sup>+</sup> spectrum of complex **C**.

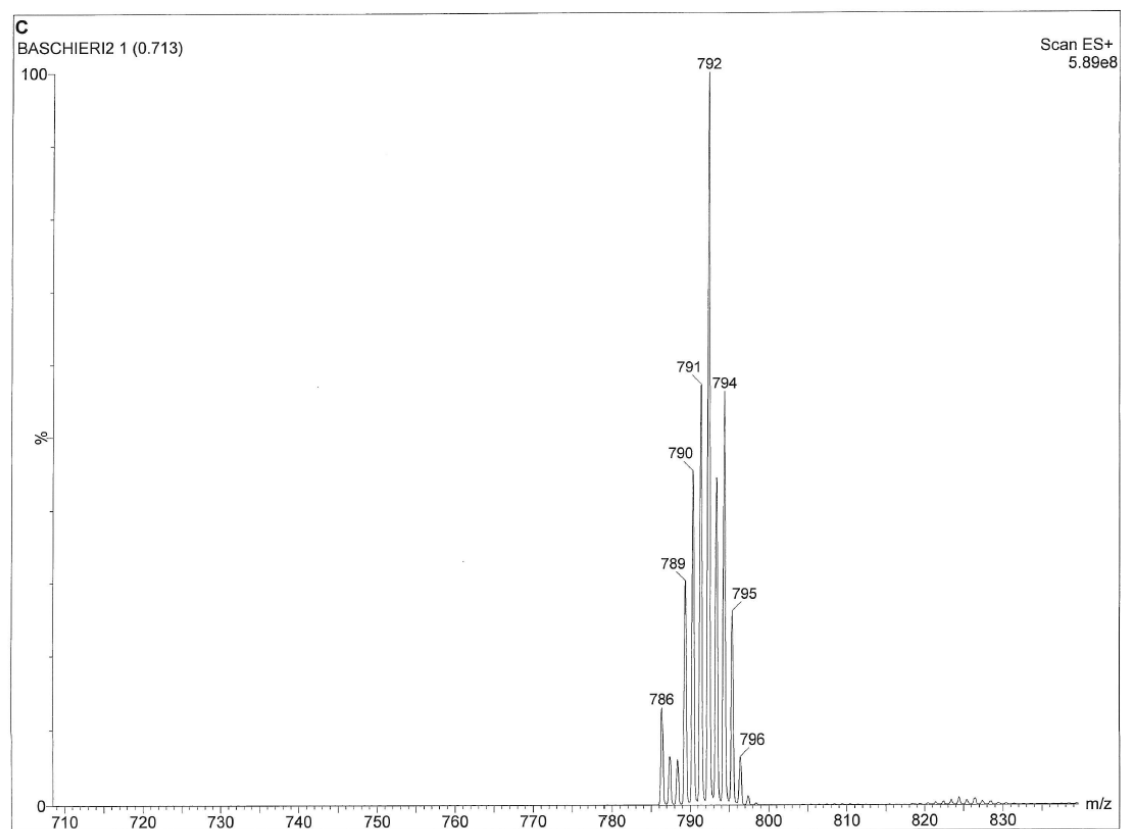

**Figure S22.** Detail of the ESI<sup>+</sup> spectrum of complex **C**.



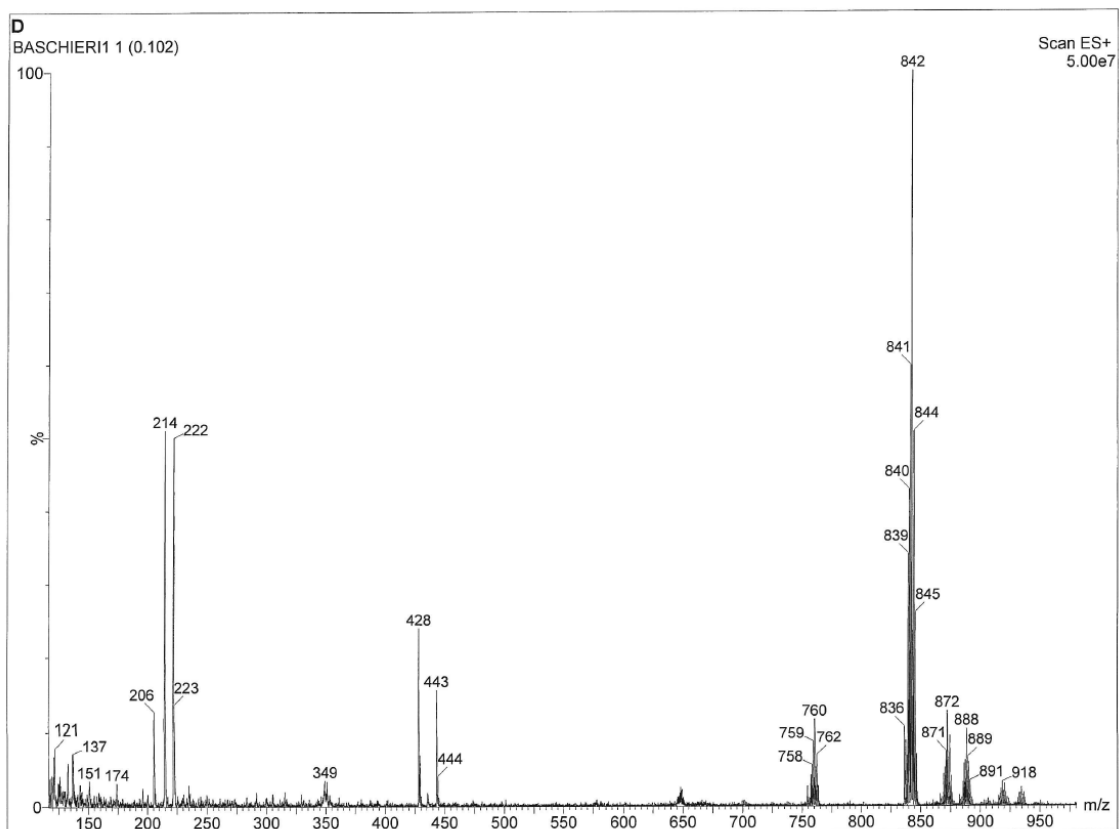

**Figure S23.** ESI<sup>+</sup> spectrum of complex **D**.

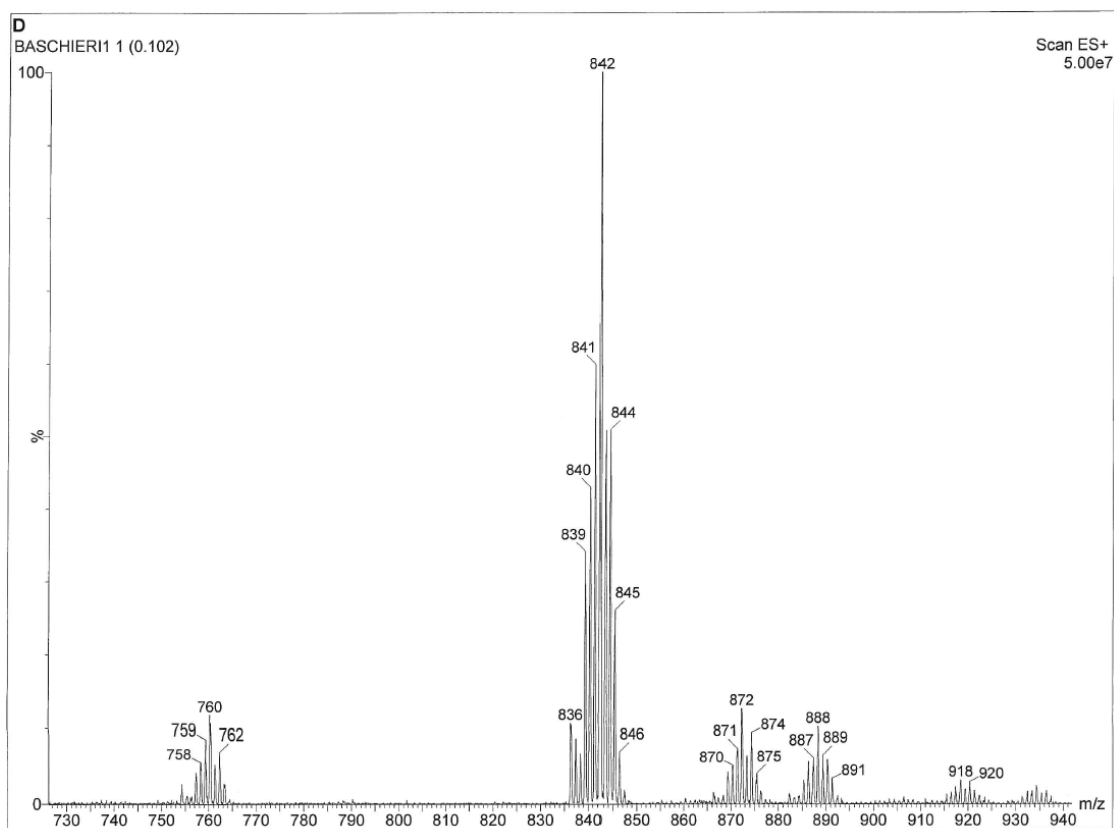

**Figure S24.** Detail of the ESI<sup>+</sup> spectrum of complex **D**.

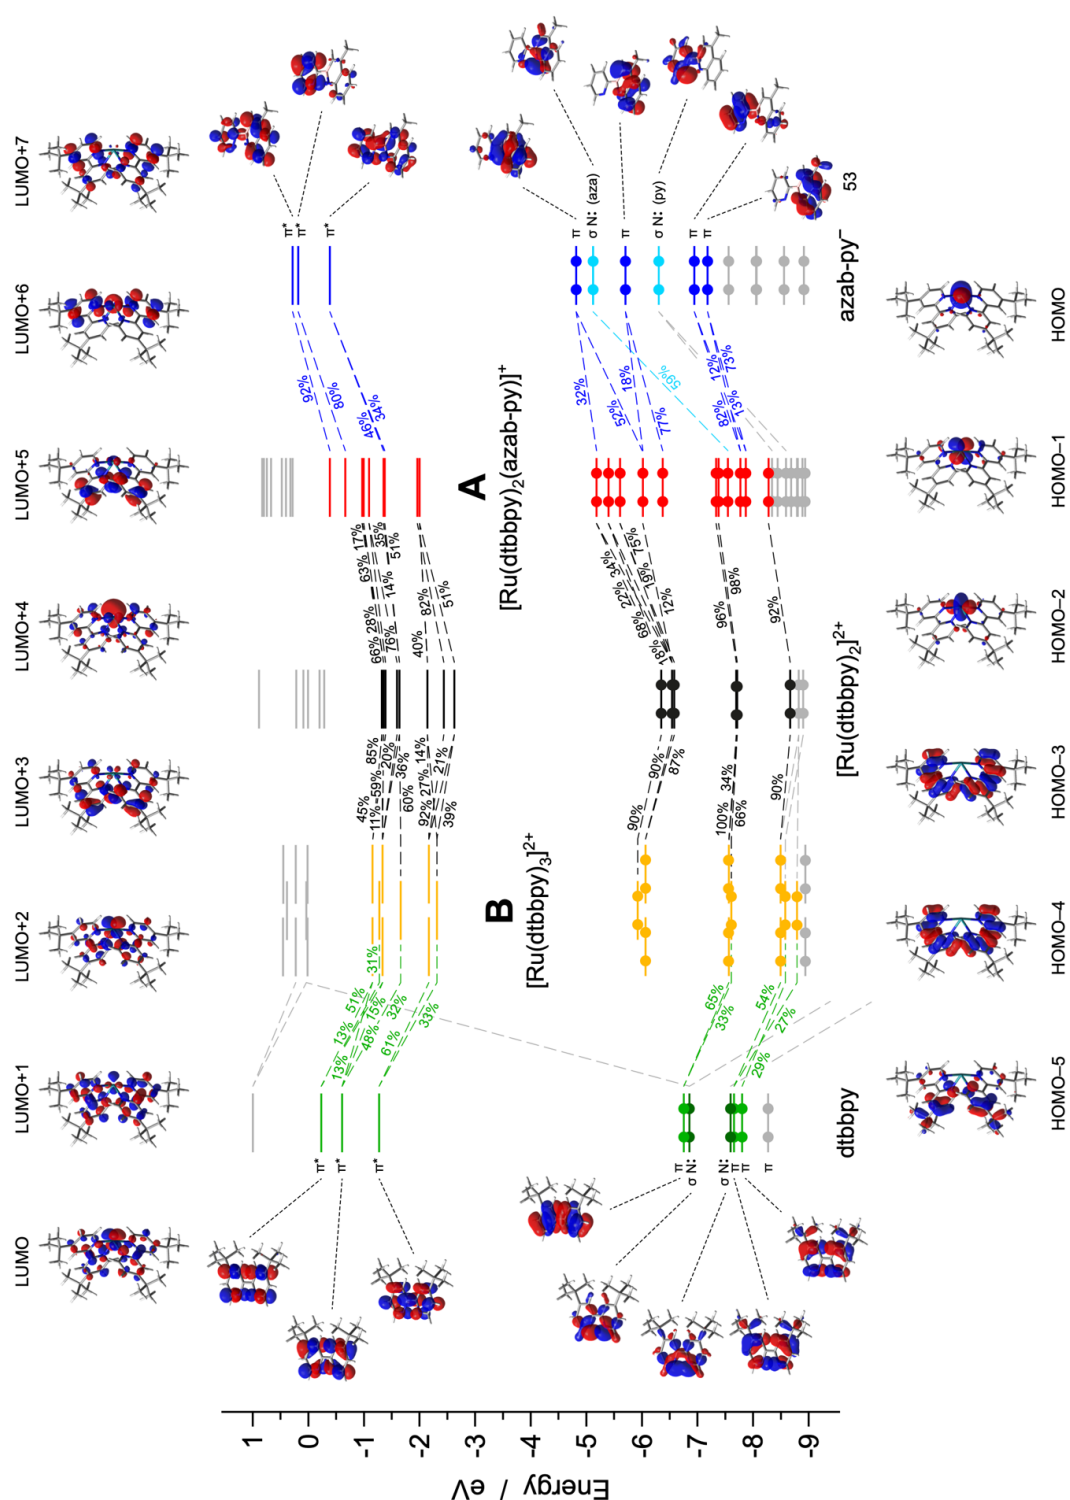

**Figure S25.** Orbital-interaction diagram of complexes **A** and **B**, calculated in acetonitrile using charge decomposition analysis (see Experimental Section for further details). Fragment orbitals are computed by dividing each complex into 2 fragments: the shared  $[\text{Ru}(\text{dtbbpy})_2]^{2+}$  moiety and the third N<sup>^</sup>N ligand (*i.e.*, another dtbbpy unit for **B** and the azaborine for **A**). Only fragment-orbital contributions above 10% are reported.



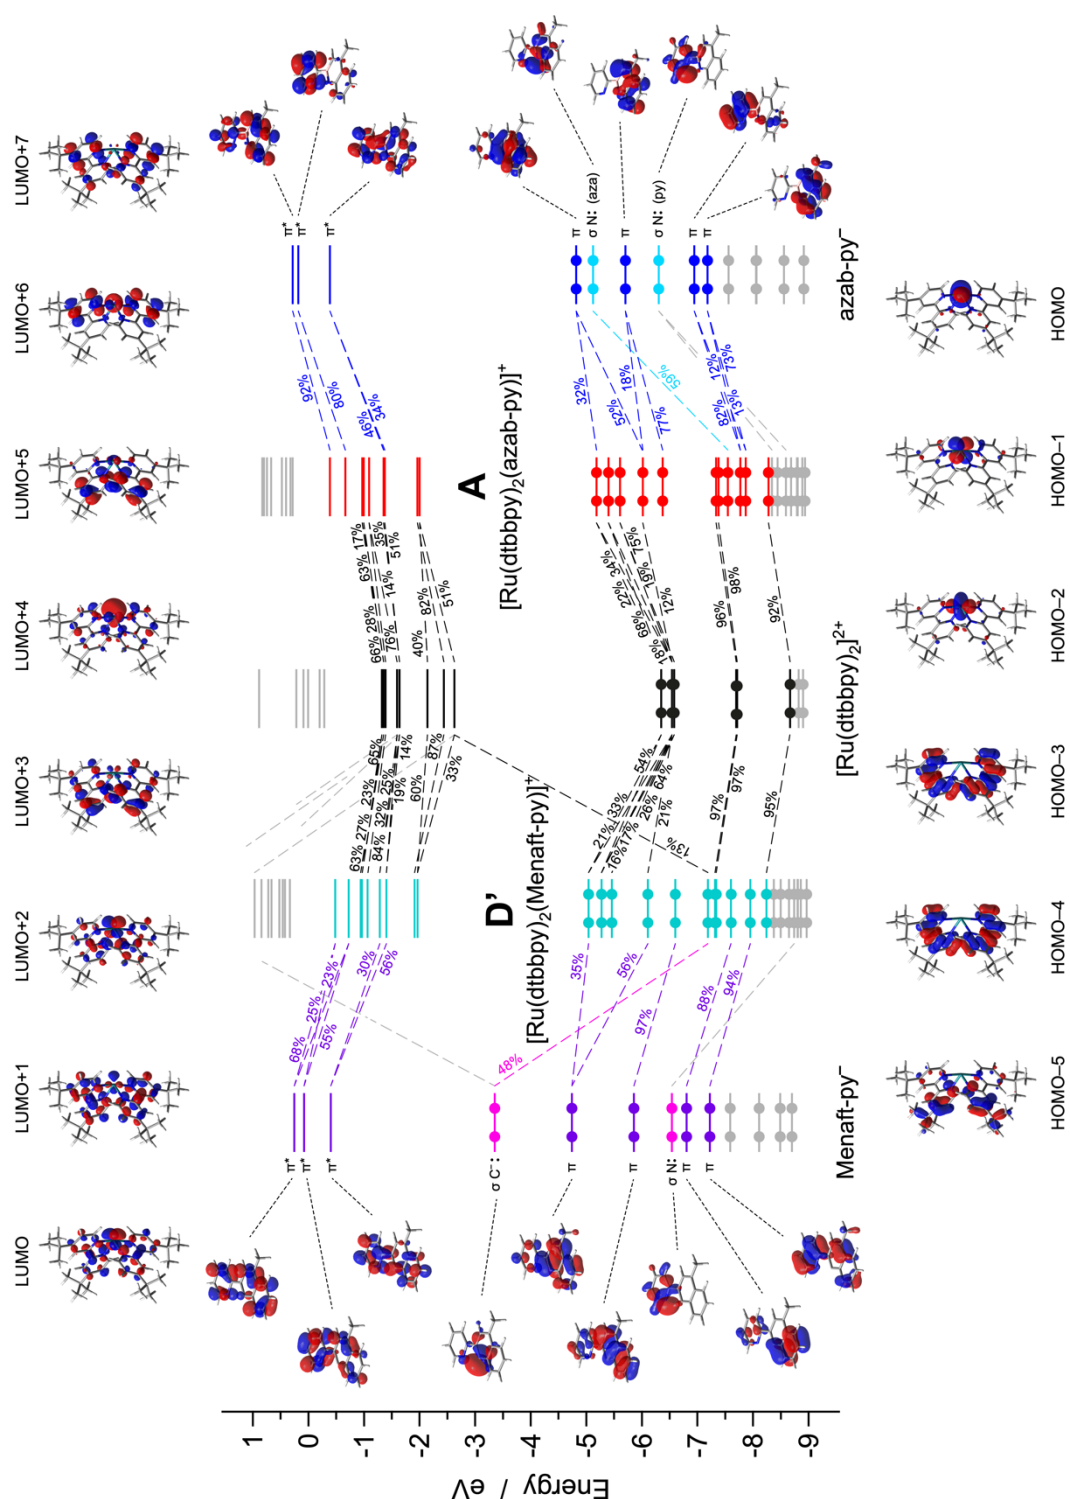

**Figure S27.** Orbital-interaction diagram of complexes **A** and **D'**, calculated in acetonitrile using charge decomposition analysis (see Experimental Section for further details). Fragment orbitals are computed by dividing each complex into 2 fragments: the shared  $[\text{Ru}(\text{dtbbpy})_2]^{2+}$  moiety and the anionic ligand (*i.e.*, the azaborine unit for **A** and the C=C counterpart for **D'**, which is just a theoretical construction). Only fragment-orbital contributions above 10% are reported.

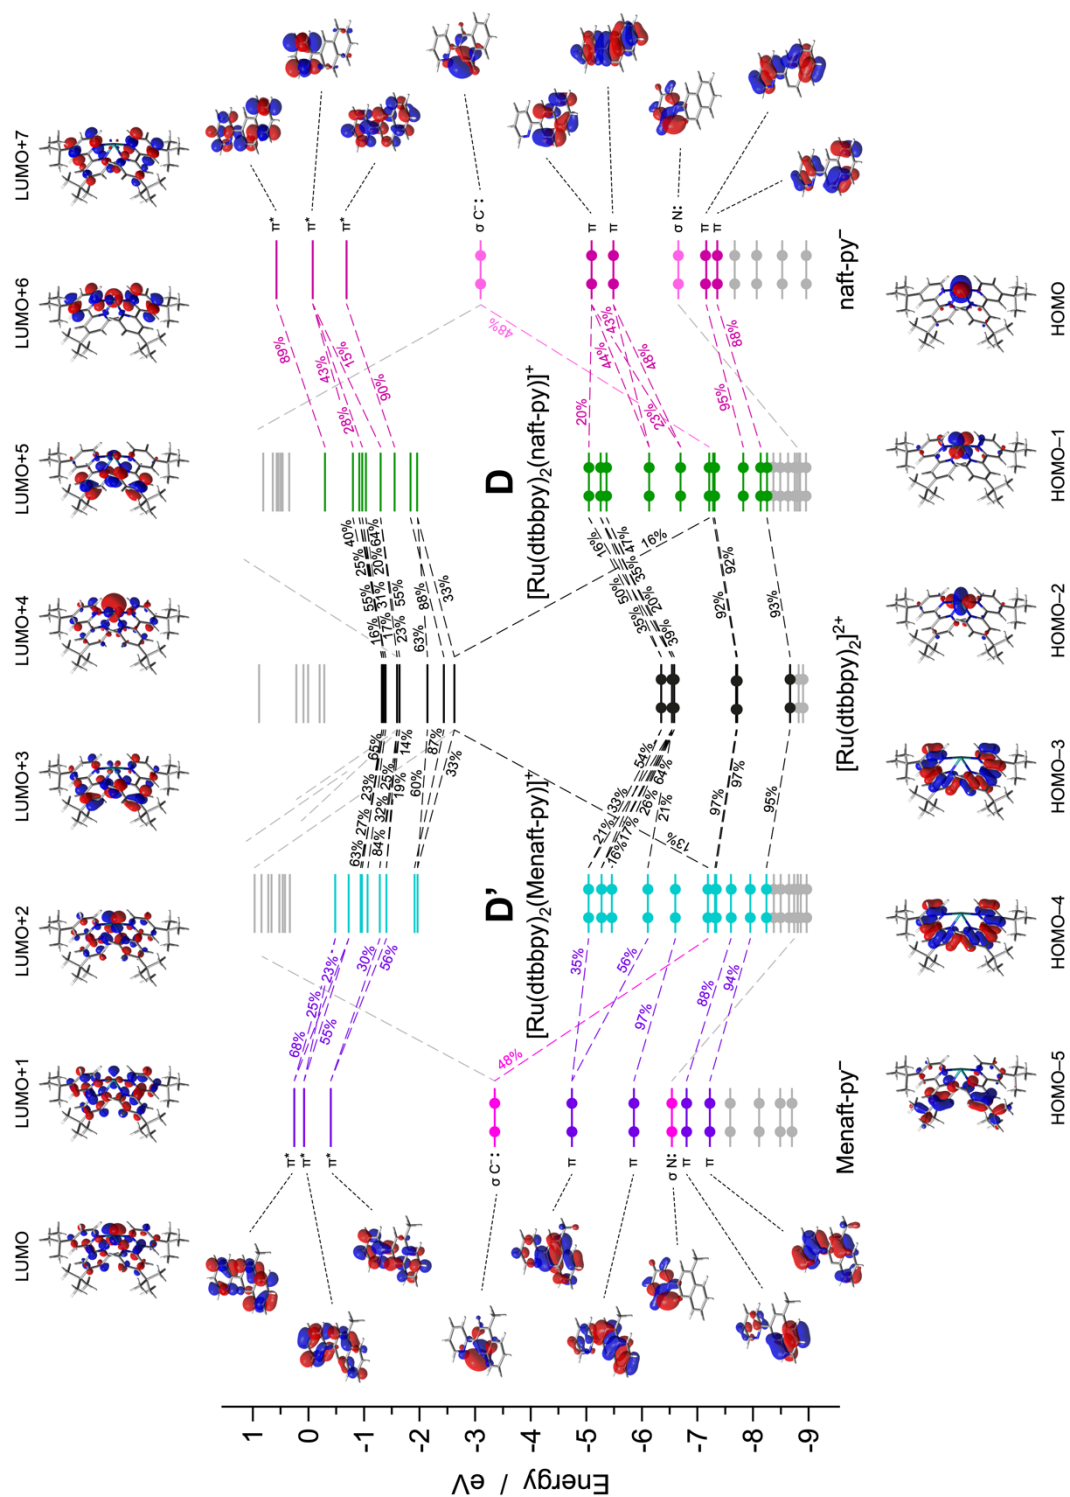

**Figure S28.** Orbital-interaction diagram of complexes **D** and **D'**, calculated in acetonitrile using charge decomposition analysis (see Experimental Section for further details). Fragment orbitals are computed by dividing each complex into 2 fragments: the shared  $[\text{Ru}(\text{dtbbpy})_2]^{2+}$  moiety and the third cyclometalating ligand (*i.e.*, the  $\text{naft-py}^-$  unit for **D** and the methylated structural analogue in **D'**). The comparison is used to mainly assess the effect of the different cyclometalation position on the naphthyl fragment. Only fragment-orbital contributions above 10% are reported.

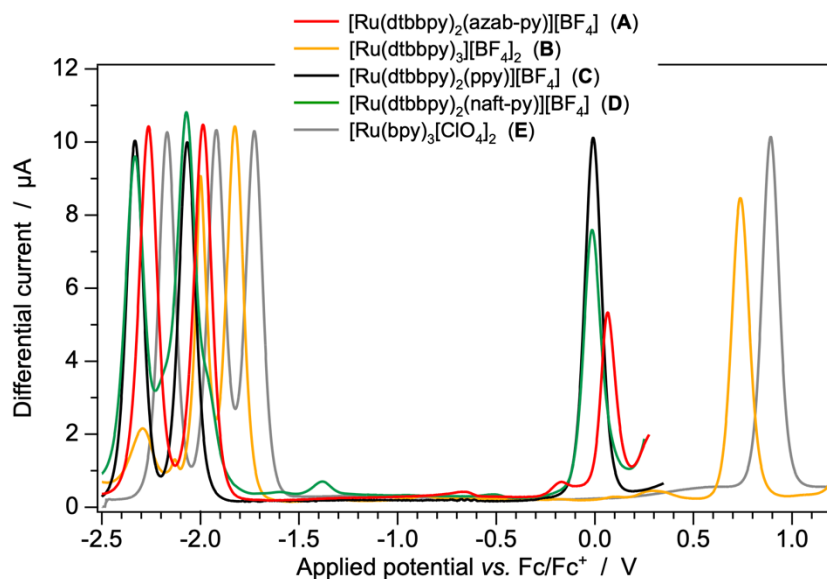

**Figure S29.** Square-wave voltammograms of complexes **A–D** and of reference compound **E** in acetonitrile solution at 298 K, recorded at a scan rate of 25 mV s<sup>-1</sup> with a square-wave amplitude of ±20 mV and a frequency of 25 Hz. Sample concentration is 1.0 mM.

**Table S1.** Comparison between electrochemical data from cyclic voltammetry (Table 1) and square-wave voltammetry in acetonitrile solution + 0.1 M TBAPF<sub>6</sub> at 298 K. All potential values are reported vs. the ferrocene/ferrocenium couple, used as internal reference.

|          | from square-wave voltammetry |                           | from cyclic voltammetry                    |                                             |
|----------|------------------------------|---------------------------|--------------------------------------------|---------------------------------------------|
|          | $E_{\text{ox}}^a$<br>[V]     | $E_{\text{red}}^a$<br>[V] | $E_{\text{ox}} (\Delta E_p)^a$<br>[V (mV)] | $E_{\text{red}} (\Delta E_p)^a$<br>[V (mV)] |
| <b>A</b> | + 0.064                      | – 1.988, – 2.264          | + 0.06 (irr.)                              | – 1.991 (70), – 2.262 (73)                  |
| <b>B</b> | + 0.739                      | – 1.827                   | + 0.735 (72)                               | – 1.825 (69)                                |
| <b>C</b> | – 0.009                      | – 2.066, – 2.332          | – 0.009 (68)                               | – 2.071 (70), – 2.333 (67)                  |
| <b>D</b> | – 0.015                      | – 2.071, – 2.333          | – 0.013 (73)                               | – 2.075 (77), – 2.328 (74)                  |
| <b>E</b> | + 0.891                      | – 1.729, – 1.922, – 2.169 | + 0.889 (73)                               | – 1.730 (70), – 1.923 (73), – 2.172 (72)    |

<sup>a</sup> The value in parenthesis is the peak-to-peak separation ( $\Delta E_p$ ).



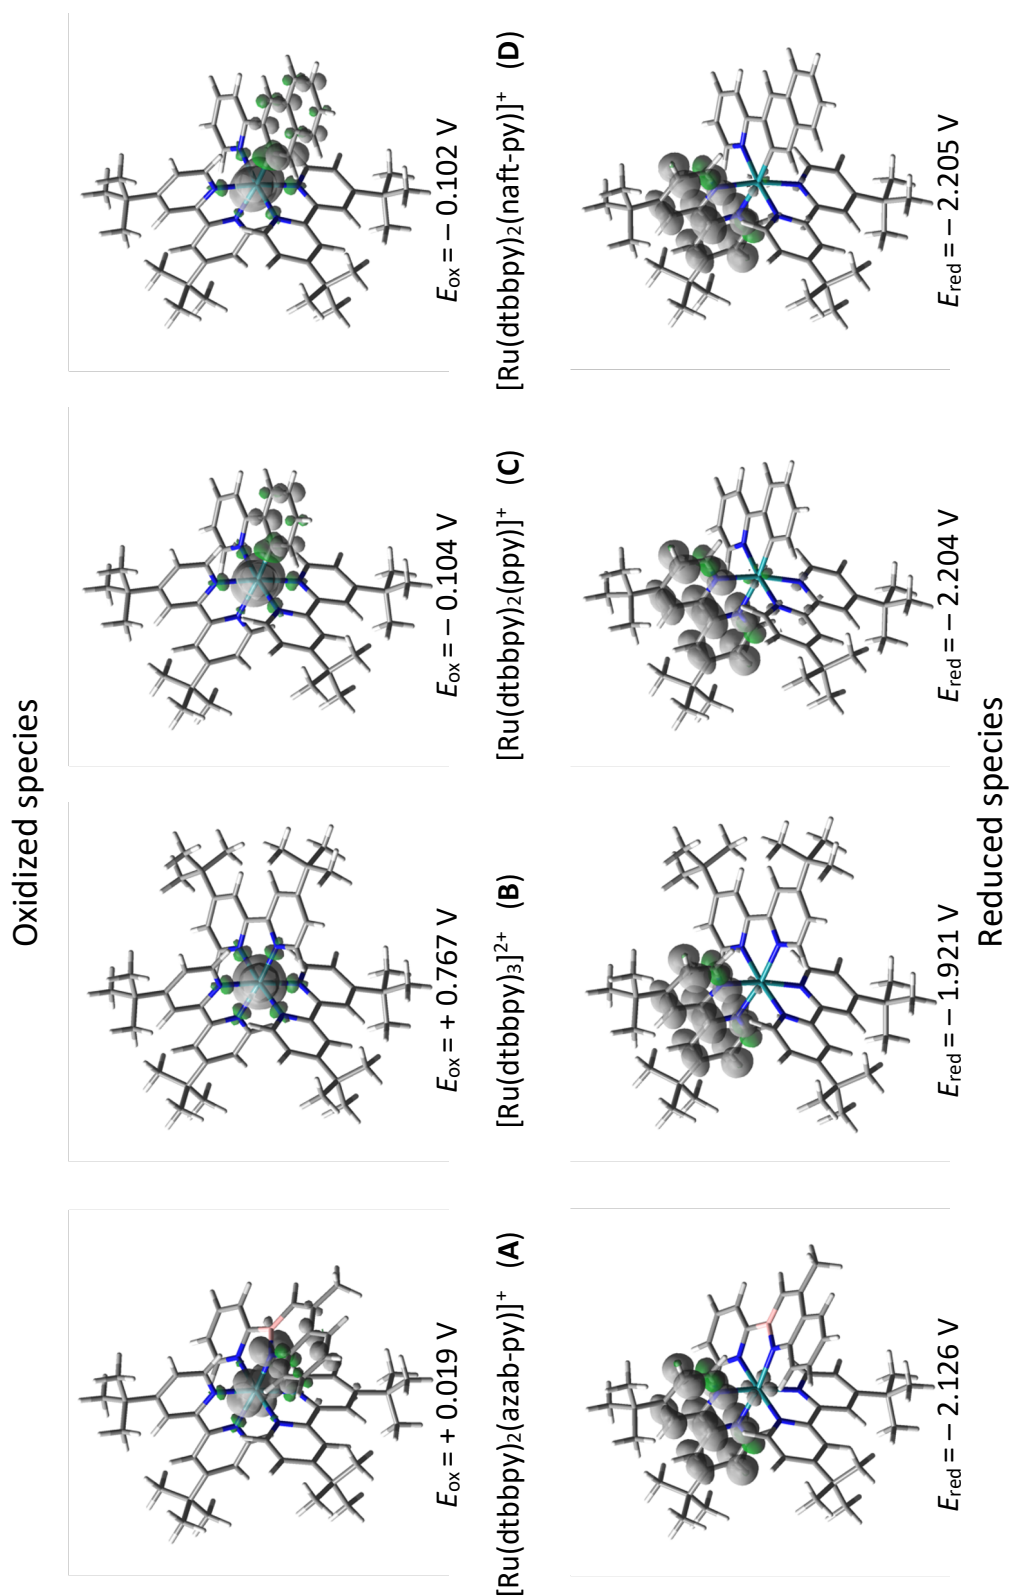

**Figure S30.** Spin-density distributions of the oxidized and reduced radicals of complexes **A–D** in their fully-relaxed geometries, computed by spin-unrestricted DFT in acetonitrile (isovalue: 0.002 e bohr<sup>-3</sup>). The DFT-estimated redox potentials vs. the ferrocene/ferrocenium couple is also reported.

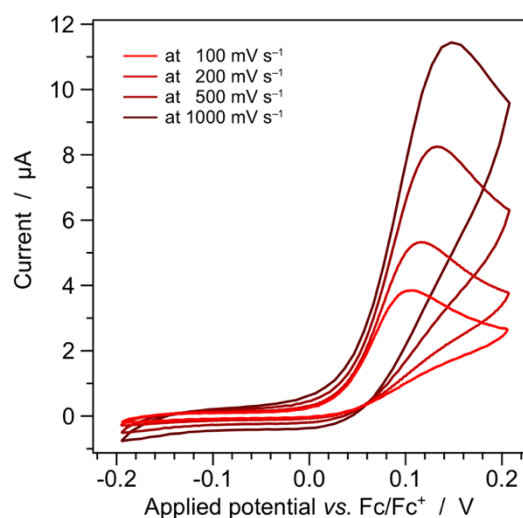

**Figure S31.** Anodic cyclic voltammograms of complex  $[\text{Ru}(\text{dtbbpy})_2(\text{azab-py})]^+$  (**A**) at different scan rates in acetonitrile solution at 298 K (sample concentration: 1.0 mM). Experiments show the complete irreversibility of the oxidation process at any scan rate.

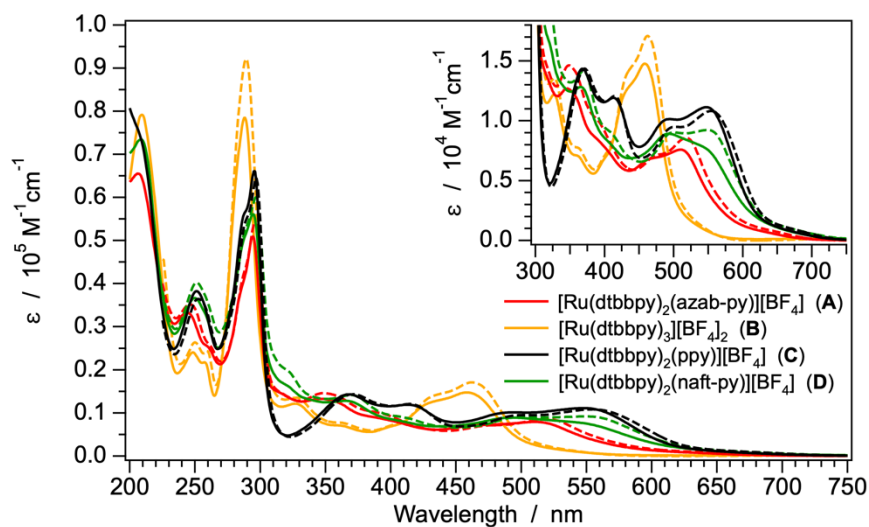

**Figure S32.** Comparison between the room-temperature absorption spectra of complexes **A–D** recorded in acetonitrile (full) and dichloromethane (dashed) solutions.



**Table S2.** Calculated NTOs couples describing the triplet excitations below 2.5 eV for [Ru(dtbbpy)<sub>2</sub>(azab-py)]<sup>+</sup> (**A**) in acetonitrile. The  $\lambda$  value is the natural transition orbital eigenvalue associated with each NTOs {Motley, 2017, 13579-13592}{Motley, 2017, 13579-13592}couple; orbital isovalue: 0.04 e<sup>-1/2</sup> bohr<sup>-3/2</sup>.

|                       | Transition<br>energy<br>[eV (nm)] | NTO couple<br>hole → electron<br>( $\lambda$ )                                      |                                                                                      | Nature                                                  |
|-----------------------|-----------------------------------|-------------------------------------------------------------------------------------|--------------------------------------------------------------------------------------|---------------------------------------------------------|
| $S_0 \rightarrow T_1$ | 1.90 (652)                        | 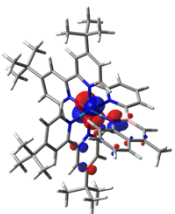   |    | <sup>3</sup> MLCT<br>from ruthenium to<br>dtbbpy ligand |
|                       |                                   | (96.3%)                                                                             |                                                                                      |                                                         |
| $S_0 \rightarrow T_2$ | 1.96 (634)                        |   |   | <sup>3</sup> MLCT<br>from ruthenium to<br>dtbbpy ligand |
|                       |                                   | (74.1%)                                                                             |                                                                                      |                                                         |
| $S_0 \rightarrow T_3$ | 2.02 (612)                        |  |  | <sup>3</sup> MLCT<br>from ruthenium to<br>dtbbpy ligand |
|                       |                                   | (76.4%)                                                                             |                                                                                      |                                                         |
| $S_0 \rightarrow T_4$ | 2.11 (589)                        |  |  | <sup>3</sup> MLCT<br>from ruthenium to<br>dtbbpy ligand |
|                       |                                   | (95.3%)                                                                             |                                                                                      |                                                         |
| $S_0 \rightarrow T_5$ | 2.14 (580)                        |  |  | <sup>3</sup> MLCT<br>from ruthenium to<br>dtbbpy ligand |
|                       |                                   | (84.7%)                                                                             |                                                                                      |                                                         |

|                       |            |                                                                                   |                                                                                    |                                                                                                 |
|-----------------------|------------|-----------------------------------------------------------------------------------|------------------------------------------------------------------------------------|-------------------------------------------------------------------------------------------------|
| $S_0 \rightarrow T_6$ | 2.37 (524) | 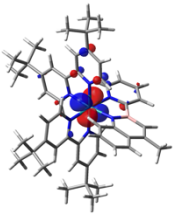 |  | ${}^3\text{MLCT}$<br>from ruthenium to<br>dtbbpy ligand                                         |
| (96.8%)               |            |                                                                                   |                                                                                    |                                                                                                 |
| $S_0 \rightarrow T_7$ | 2.42 (512) |  |  | mixed ${}^3\text{LC}/{}^3\text{MLCT}$<br>involving the<br>azaborine ligand and<br>ruthenium ion |
| (90.5%)               |            |                                                                                   |                                                                                    |                                                                                                 |

**Table S3.** Calculated NTOs couples describing the triplet excitations below 2.5 eV for  $[\text{Ru}(\text{dtbbpy})_3]^{2+}$  (**B**) in acetonitrile. The  $\lambda$  value is the natural transition orbital eigenvalue associated with each NTOs couple; orbital isovalue:  $0.04 \text{ e}^{-1/2} \text{ bohr}^{-3/2}$ . State symmetry is also reported, accordingly to the  $D_3$  point group.

|                                    | Transition<br>energy<br>[eV (nm)] | NTO couple<br>hole $\rightarrow$ electron<br>( $\lambda$ )                          |                                                                                      | Nature                                                  |
|------------------------------------|-----------------------------------|-------------------------------------------------------------------------------------|--------------------------------------------------------------------------------------|---------------------------------------------------------|
| $S_0 \rightarrow T_1$<br>(E)       | 2.34 (530)                        | 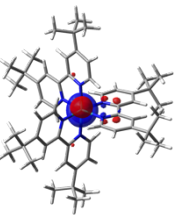 |  | ${}^3\text{MLCT}$<br>from ruthenium to<br>dtbbpy ligand |
| (93.0%)                            |                                   |                                                                                     |                                                                                      |                                                         |
| $S_0 \rightarrow T_2$<br>(E)       | 2.34 (530)                        |  |  | ${}^3\text{MLCT}$<br>from ruthenium to<br>dtbbpy ligand |
| (92.9%)                            |                                   |                                                                                     |                                                                                      |                                                         |
| $S_0 \rightarrow T_3$<br>( $A_2$ ) | 2.36 (524)                        |  |  | ${}^3\text{MLCT}$<br>from ruthenium to<br>dtbbpy ligand |
| (89.0%)                            |                                   |                                                                                     |                                                                                      |                                                         |

---

$S_0 \rightarrow T_4$   
(A<sub>2</sub>)

2.38 (521)

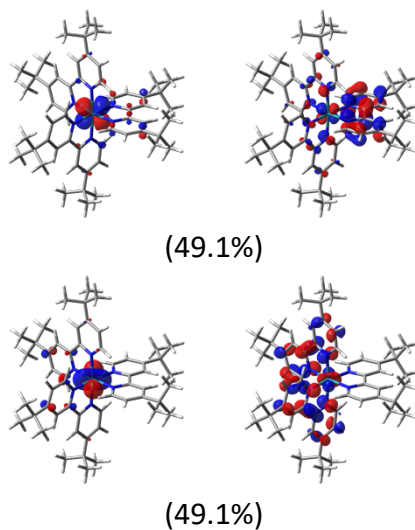

<sup>3</sup>MLCT  
from ruthenium to  
dtbbpy ligand

---

$S_0 \rightarrow T_5$   
(E)

2.47 (502)

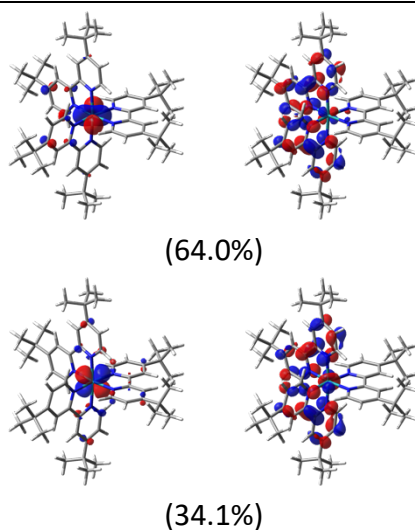

<sup>3</sup>MLCT  
from ruthenium to  
dtbbpy ligand

---

$S_0 \rightarrow T_7$   
(E)

2.47 (502)

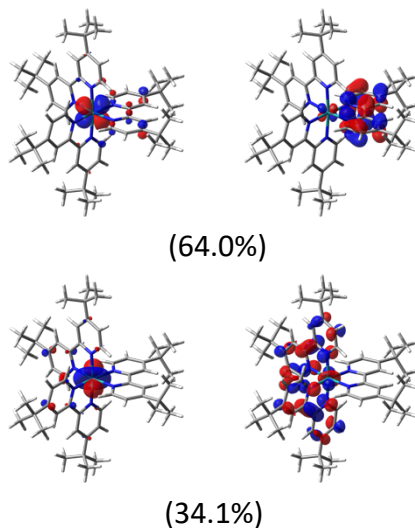

<sup>3</sup>MLCT  
from ruthenium to  
dtbbpy ligand

---

**Table S4.** Calculated NTOs couples describing the triplet excitations below 2.5 eV for  $[\text{Ru}(\text{dtbbpy})_2(\text{ppy})]^+$  (**C**) in acetonitrile. The  $\lambda$  value is the natural transition orbital eigenvalue associated with each NTOs couple; orbital isovalue:  $0.04 \text{ e}^{-1/2} \text{ bohr}^{-3/2}$ .

|                       | Transition<br>energy<br>[eV (nm)] | NTO couple<br>hole $\rightarrow$ electron<br>( $\lambda$ )                          |                                                                                      | Nature                                                |
|-----------------------|-----------------------------------|-------------------------------------------------------------------------------------|--------------------------------------------------------------------------------------|-------------------------------------------------------|
| $S_0 \rightarrow T_1$ | 1.83 (676)                        | 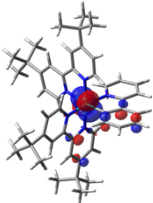   |    | $^3\text{MLCT}$<br>from ruthenium to<br>dtbbpy ligand |
|                       |                                   | (98.3%)                                                                             |                                                                                      |                                                       |
| $S_0 \rightarrow T_2$ | 1.89 (657)                        |    |    | $^3\text{MLCT}$<br>from ruthenium to<br>dtbbpy ligand |
|                       |                                   | (95.5%)                                                                             |                                                                                      |                                                       |
| $S_0 \rightarrow T_3$ | 1.93 (641)                        |  |  | $^3\text{MLCT}$<br>from ruthenium to<br>dtbbpy ligand |
|                       |                                   | (97.6%)                                                                             |                                                                                      |                                                       |
| $S_0 \rightarrow T_4$ | 2.05 (605)                        |  |  | $^3\text{MLCT}$<br>from ruthenium to<br>dtbbpy ligand |
|                       |                                   | (89.9%)                                                                             |                                                                                      |                                                       |
| $S_0 \rightarrow T_5$ | 2.16 (574)                        |  |  | $^3\text{MLCT}$<br>from ruthenium to<br>dtbbpy ligand |
|                       |                                   | (98.3%)                                                                             |                                                                                      |                                                       |

|                       |      |       |                                                                                                                                                                      |                                                       |
|-----------------------|------|-------|----------------------------------------------------------------------------------------------------------------------------------------------------------------------|-------------------------------------------------------|
| $S_0 \rightarrow T_6$ | 2.18 | (568) | 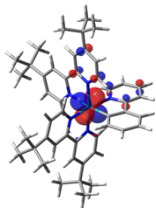  | $^3\text{MLCT}$<br>from ruthenium to<br>dtbbpy ligand |
| (99.3%)               |      |       |                                                                                                                                                                      |                                                       |
| $S_0 \rightarrow T_7$ | 2.39 | (518) |   | {Motley, 2017,<br>13579-13592}                        |
| (96.8%)               |      |       |                                                                                                                                                                      |                                                       |

**Table S5.** Calculated NTOs couples describing the triplet excitations below 2.5 eV for  $[\text{Ru}(\text{dtbbpy})_2(\text{naft-py})]^+$  (**D**) in acetonitrile. The  $\lambda$  value is the natural transition orbital eigenvalue associated with each NTOs couple; orbital isovalue:  $0.04 \text{ e}^{-1/2} \text{ bohr}^{-3/2}$ .

|                       | Transition<br>energy<br>[eV (nm)] | NTO couple<br>hole $\rightarrow$ electron<br>( $\lambda$ )                                                                                                               |         | Nature                                                |
|-----------------------|-----------------------------------|--------------------------------------------------------------------------------------------------------------------------------------------------------------------------|---------|-------------------------------------------------------|
| $S_0 \rightarrow T_1$ | 1.83 (678)                        | 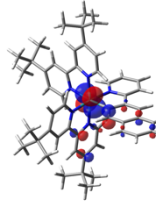  | (98.2%) | $^3\text{MLCT}$<br>from ruthenium to<br>dtbbpy ligand |
| $S_0 \rightarrow T_2$ | 1.90 (653)                        |   | (94.2%) | $^3\text{MLCT}$<br>from ruthenium to<br>dtbbpy ligand |
| $S_0 \rightarrow T_3$ | 1.94 (639)                        |   | (94.6%) | $^3\text{MLCT}$<br>from ruthenium to<br>dtbbpy ligand |

|                       |      |       |                                                                                      |                                                                                           |
|-----------------------|------|-------|--------------------------------------------------------------------------------------|-------------------------------------------------------------------------------------------|
| $S_0 \rightarrow T_4$ | 2.06 | (603) | 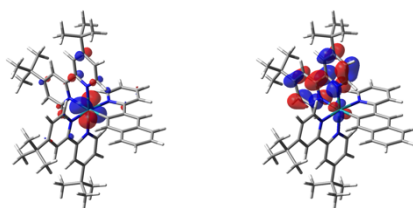   | $^3\text{MLCT}$<br>from ruthenium to<br>dtbbpy ligand                                     |
| (88.9%)               |      |       |                                                                                      |                                                                                           |
| $S_0 \rightarrow T_5$ | 2.14 | (580) |    | $^3\text{MLCT}$<br>from ruthenium to<br>dtbbpy ligand                                     |
| (98.4%)               |      |       |                                                                                      |                                                                                           |
| $S_0 \rightarrow T_6$ | 2.18 | (569) |    | $^3\text{MLCT}$<br>from ruthenium to<br>dtbbpy ligand                                     |
| (98.6%)               |      |       |                                                                                      |                                                                                           |
| $S_0 \rightarrow T_7$ | 2.21 | (560) |   | mixed $^3\text{LC}/^3\text{MLCT}$<br>involving<br>the naft-py ligand<br>and ruthenium ion |
| (93.6%)               |      |       |                                                                                      |                                                                                           |
| $S_0 \rightarrow T_8$ | 2.37 | (524) |  | mixed $^3\text{LC}/^3\text{MLCT}$<br>involving<br>the naft-py ligand<br>and ruthenium ion |
| (92.7%)               |      |       |                                                                                      |                                                                                           |

**Table S6.** Calculated NTOs couples describing the triplet excitations below 2.5 eV for  $[\text{Ru}(\text{dtbbpy})_2(\text{Me-naft-py})]^+$  (**D'**) in acetonitrile. The  $\lambda$  value is the natural transition orbital eigenvalue associated with each NTOs couple; orbital isovalue:  $0.04 \text{ e}^{-1/2} \text{ bohr}^{-3/2}$ .

|                       | Transition<br>energy<br>[eV (nm)] | NTO couple<br>hole → electron<br>( $\lambda$ )                                      |                                                                                      | Nature                                                                                       |
|-----------------------|-----------------------------------|-------------------------------------------------------------------------------------|--------------------------------------------------------------------------------------|----------------------------------------------------------------------------------------------|
| $S_0 \rightarrow T_1$ | 1.83 (678)                        | 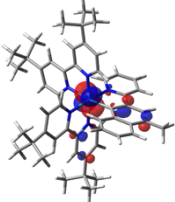   |    | $^3\text{MLCT}$<br>from ruthenium to<br>dtbbpy ligand                                        |
|                       |                                   | (97.6%)                                                                             |                                                                                      |                                                                                              |
| $S_0 \rightarrow T_2$ | 1.90 (654)                        |    |    | $^3\text{MLCT}$<br>from ruthenium to<br>dtbbpy ligand                                        |
|                       |                                   | (95.3%)                                                                             |                                                                                      |                                                                                              |
| $S_0 \rightarrow T_3$ | 1.93 (643)                        |  |  | $^3\text{MLCT}$<br>from ruthenium to<br>dtbbpy ligand                                        |
|                       |                                   | (96.4%)                                                                             |                                                                                      |                                                                                              |
| $S_0 \rightarrow T_4$ | 2.09 (594)                        |  |  | $^3\text{MLCT}$<br>from ruthenium to<br>dtbbpy ligand                                        |
|                       |                                   | (78.9%)                                                                             |                                                                                      |                                                                                              |
| $S_0 \rightarrow T_5$ | 2.13 (583)                        |  |  | mixed $^3\text{LC}/^3\text{MLCT}$<br>involving the<br>Me-naft-py ligand<br>and ruthenium ion |
|                       |                                   | (82.3%)                                                                             |                                                                                      |                                                                                              |

|                       |      |       |                                                                                    |                                                                                  |
|-----------------------|------|-------|------------------------------------------------------------------------------------|----------------------------------------------------------------------------------|
| $S_0 \rightarrow T_6$ | 2.13 | (581) | 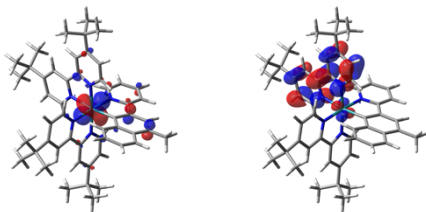 | ${}^3\text{MLCT}$<br>from ruthenium to<br>dtbbpy ligand                          |
| (96.6%)               |      |       |                                                                                    |                                                                                  |
| $S_0 \rightarrow T_7$ | 2.25 | (552) |  | ${}^3\text{MLCT}$<br>from ruthenium to<br>dtbbpy ligand                          |
| (98.8%)               |      |       |                                                                                    |                                                                                  |
| $S_0 \rightarrow T_8$ | 2.50 | (494) |  | mainly ${}^3\text{MLCT}$<br>involving<br>the naft-py ligand<br>and ruthenium ion |
| (95.7%)               |      |       |                                                                                    |                                                                                  |



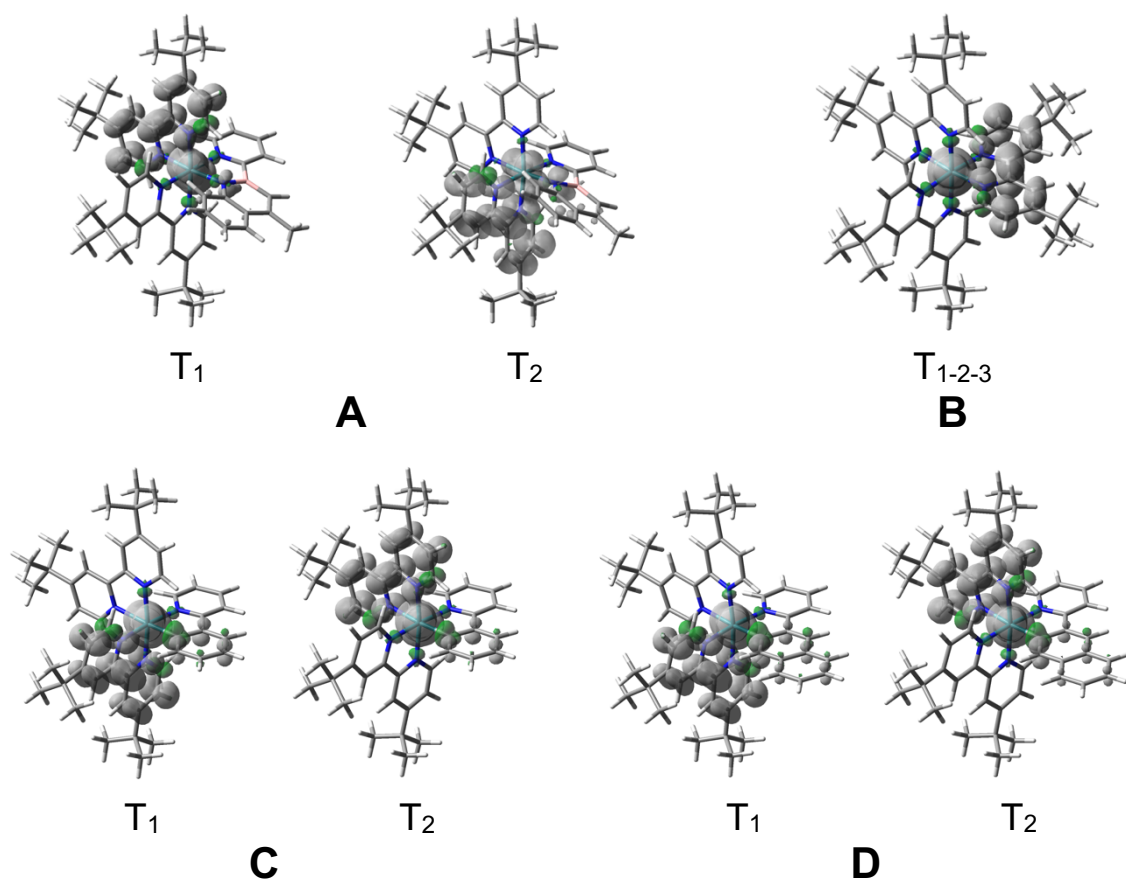

**Figure S33.** Spin-density distribution of the lowest triplet states of complexes **A–D** in their fully-optimized geometry, computed in acetonitrile (isovalues:  $0.002 \text{ e bohr}^{-3}$ ). For all the complexes, the depicted triplets are  $^3\text{MLCT}$  in nature, formally involving the excitation of one electron from the ruthenium(II) centre to the  $\pi^*$  orbitals of the dtbbpy ligands. Notably, two very close  $^3\text{MLCT}$  triplets ( $T_1$  and  $T_2$ ) are found in **A**, **C** and **D** due to the asymmetry of the azaborine or  $\text{C}^{\wedge}\text{N}$  ligand, removing the equivalency of the dtbbpy ligands (which, on the contrary, is preserved in **B**). The energy difference between such minima is only 9 meV for **A**, and 68 or 67 meV in the case of **C** or **D**.

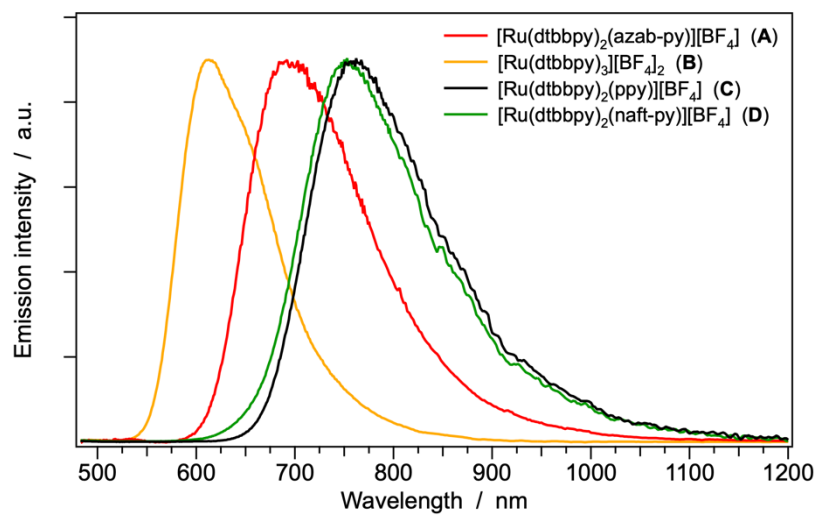

**Figure S34.** Normalized emission spectra of complexes **A–D** in 1% PMMA matrix at 298 K.
